# Supplementary material for: Theoretical investigation of tautomerism of 2- and 4-pyridones: origin, substituent and solvent effects
Source: Royal Society of Chemistry journal article supplement (doi:10.1039/d3ob01588b), 2023-11-29
Supplement: d3ob01588b1.pdf [file d3ob01588b1.pdf]

# Theoretical Investigation of Tautomerism of 2- and 4-Pyridones: Origin, Substituent and Solvent Effects

Marija Baranac-Stojanović,<sup>1\*</sup> Jovana Aleksić<sup>2</sup> and Milovan Stojanović<sup>2</sup>

<sup>1</sup> University of Belgrade - Faculty of Chemistry, Studentski trg 12-16, P.O.Box 158, 11000 Belgrade, Serbia

<sup>2</sup> University of Belgrade - Institute of Chemistry, Technology and Metallurgy - Center for Chemistry, Njegoševa 12, P.O.Box 473, 11000 Belgrade, Serbia

## Supplementary Information

### Table of Contents

|                                                                                                                                                                                                                                                                                                                            |    |
|----------------------------------------------------------------------------------------------------------------------------------------------------------------------------------------------------------------------------------------------------------------------------------------------------------------------------|----|
| <b>Table S1 and Figure S1.</b> Comparison of calculated and experimental bond lengths of 2-pyridone and 2-hydroxypyridine.....                                                                                                                                                                                             | S2 |
| <b>Table S2 and Figure S2.</b> Comparison of calculated and experimental bond lengths of 4-pyridone.....                                                                                                                                                                                                                   | S3 |
| <b>Figure S3.</b> AICD plots of 2-pyridone, <i>syn</i> -2-hydroxypyridine, 4-pyridone and 4-hydroxypyridine.....                                                                                                                                                                                                           | S4 |
| <b>Table S3.</b> Ring energy decomposition analysis of 2- and 4-pyridones.....                                                                                                                                                                                                                                             | S5 |
| <b>Table S4.</b> Energy decomposition analysis of double bonds in 2-pyridone/2-hydroxypyridine and 4-pyridone/4-hydroxypyridine.....                                                                                                                                                                                       | S5 |
| <b>Table S5.</b> Gibbs free energy difference between <i>anti</i> - and <i>syn</i> -conformers with respect to the OH group rotation, tautomerization Gibbs free energies, Gibbs free energies for proton transfer to water molecule in gas phase and increase/decrease of acidity relative to unsubstituted pyridone..... | S6 |
| <b>Table S6 and Figure S4.</b> Comparison of calculated and experimental bond lengths of 6-chloro-2-hydroxypyridine.....                                                                                                                                                                                                   | S7 |
| Absolute energies and x, y, z coordinates of the gas-phase optimized structures at the BHandHLYP/6-311+G(d,p) level of theory.....                                                                                                                                                                                         | S8 |

**Table S1.** Comparison of calculated, BHandHLYP/6-311+G(d,p), and experimental bond lengths of 2-pyridone (**2PY**) and *syn*-2-hydroxypyridine (*syn*-**2HPY**) in the gas phase.

| Bond | <b>2PY</b> |                   | <i>syn</i> - <b>2HPY</b> |                   |
|------|------------|-------------------|--------------------------|-------------------|
|      | Calc.      | Exp. <sup>a</sup> | Calc.                    | Exp. <sup>a</sup> |
| N1C2 | 1.390      | 1.396             | 1.313                    | 1.320             |
| C2C3 | 1.446      | 1.471             | 1.392                    | 1.410             |
| C3C4 | 1.350      | 1.355             | 1.375                    | 1.392             |
| C4C5 | 1.423      | 1.451             | 1.390                    | 1.410             |
| C6N1 | 1.357      | 1.376             | 1.330                    | 1.344             |
| C2O  | 1.210      | 1.203             | 1.339                    | 1.336             |
| N1H  | 1.002      | 1.005             | /                        | /                 |
| OH   | /          | /                 | 0.955                    | 0.960             |

<sup>a</sup> From ref. 6c.

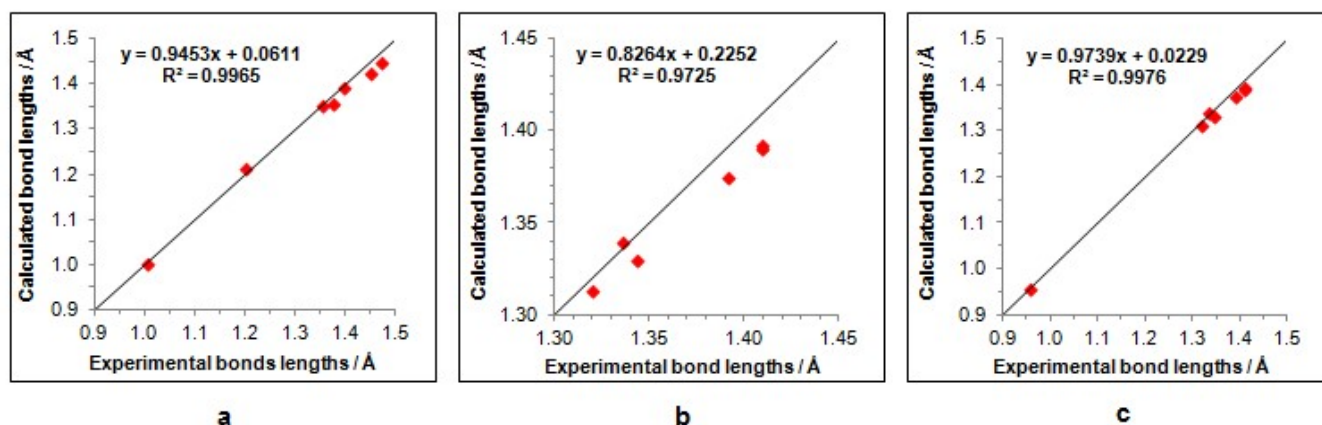

**Figure S1.** Correlations between calculated, BHandHLYP/6-311+G(d,p), and experimental<sup>6c</sup> bond lengths of 2-pyridone (**a**) and *syn*-2-hydroxypyridine (**b** - without the O–H bond, **c** - including the O–H bond) in the gas phase.

**Table S2.** Comparison of calculated, BHandHLYP/6-311+G(d,p), and experimental bond lengths of 4-pyridone (**4PY**) obtained by x-ray analysis.

|      | <b>4PY</b> |                   |
|------|------------|-------------------|
| Bond | Calc.      | Exp. <sup>a</sup> |
| N1C2 | 1.363      | 1.354             |
| N1C6 | 1.363      | 1.354             |
| C2C3 | 1.342      | 1.362             |
| C5C6 | 1.342      | 1.347             |
| C4O  | 1.215      | 1.274             |

<sup>a</sup>Ref. 9a.

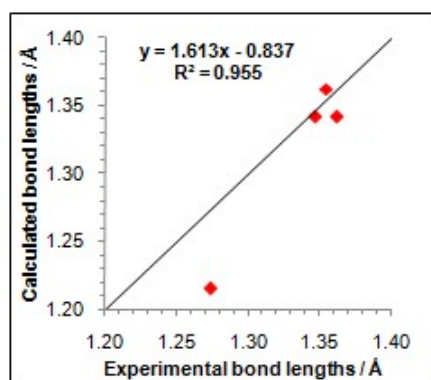

**Figure S2.** Correlation between calculated, BHandHLYP/6-311+G(d,p), and experimental<sup>9a</sup> bond lengths of 4-pyridone obtained by x-ray analysis.

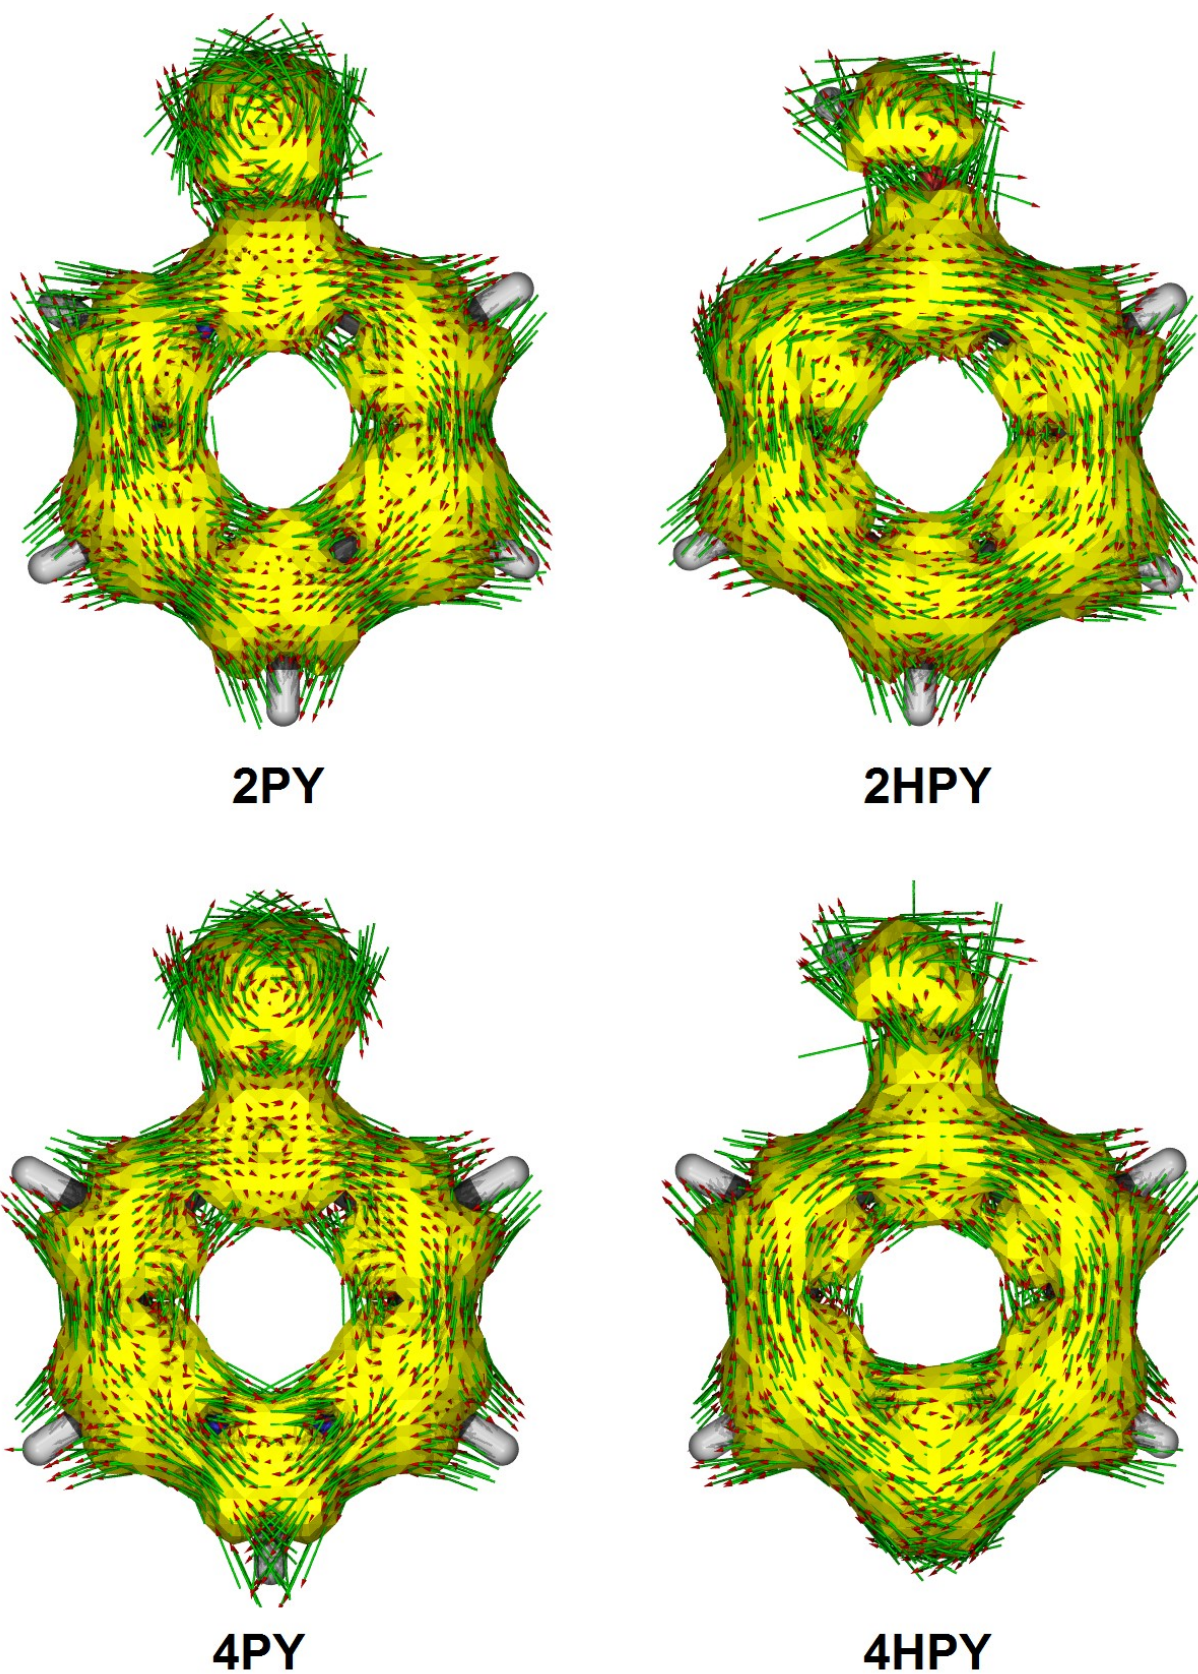

**Figure S3.** AICD plots of 2-pyridone (**2PY**), *syn*-2-hydroxypyridine (**2HPY**), 4-pyridone (**4PY**) and 4-hydroxypyridine (**4HPY**) at an isovalue of 0.05 a.u. Clockwise circulation is diatropic and counterclockwise circulation is paratropic.

**Table S3.** Ring energy decomposition analysis of 2- and 4-pyridones. Values are in kcal/mol.<sup>a</sup>

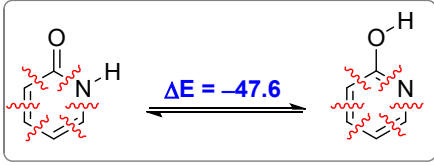

4 x CH 1 x C=O 1 x NH for lactam



4 x CH 1 x C-OH 1 x N for lactim

|                            | 2PY     | 2HPY    | 2PY → 2HPY    | 4PY     | 4HPY    | 4PY → 4HPY   |
|----------------------------|---------|---------|---------------|---------|---------|--------------|
| $\Delta E_{\text{elstat}}$ | -981.7  | -1100.7 | <b>-119.0</b> | -1117.6 | -1094.6 | <b>23.0</b>  |
| $\Delta E_{\text{Pauli}}$  | 1690.7  | 1812.9  | <b>122.2</b>  | 1881.8  | 1797.8  | <b>-84.0</b> |
| $\Delta E_{\text{oi}}$     | -1332.2 | -1357.1 | <b>-24.9</b>  | -1378.4 | -1340.7 | <b>37.8</b>  |
| $\Delta E_{\text{disp}}$   | -230.0  | -255.1  | <b>-25.1</b>  | -229.7  | -254.8  | <b>-25.0</b> |
| $\Delta E_{\text{int}}$    | -853.3  | -900.0  | <b>-46.8</b>  | -844.0  | -892.2  | <b>-48.2</b> |
| $\Delta E_{\text{def}}$    | 1.2     | 0.3     | <b>-0.8</b>   | 1.6     | 0.2     | <b>-1.4</b>  |
| $\Delta E_{\text{bond}}$   | -852.1  | -899.7  | <b>-47.6</b>  | -842.4  | -892.0  | <b>-49.6</b> |

<sup>a</sup>  $\Delta E_{\text{elstat}}$  = electrostatic energy,  $\Delta E_{\text{Pauli}}$  = Pauli repulsion energy,  $\Delta E_{\text{oi}}$  = orbital interaction energy,  $\Delta E_{\text{disp}}$  = dispersion energy,  $\Delta E_{\text{int}}$  = interaction energy (the sum of the previous four energies),  $\Delta E_{\text{def}}$  = deformation energy,  $\Delta E_{\text{bond}}$  = bonding energy.

**Table S4.** Energy decomposition analysis of double bonds in 2-pyridone/2-hydroxypyridine and 4-pyridone/4-hydroxypyridine. Values are in kcal/mol.<sup>a</sup>

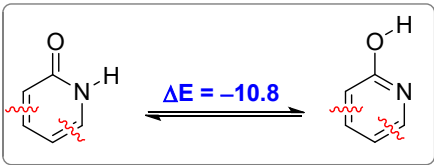

2 interacting fragments in their quintet state for both forms



2 interacting fragments in their quintet state for lactam  
2 interacting fragments in their quartet state for lactim

|                            | 2PY    | 2HPY   | 2PY → 2HPY   | 4PY    | 4HPY   | 4PY → 4HPY   |
|----------------------------|--------|--------|--------------|--------|--------|--------------|
| $\Delta E_{\text{elstat}}$ | -373.9 | -369.5 | <b>4.4</b>   | -359.9 | -369.5 | <b>-9.6</b>  |
| $\Delta E_{\text{Pauli}}$  | 551.8  | 548.9  | <b>-2.8</b>  | 549.2  | 581.5  | <b>32.3</b>  |
| $\Delta E_{\text{oi}}$     | -474.2 | -491.1 | <b>-16.9</b> | -508.3 | -432.2 | <b>76.1</b>  |
| $\Delta E_{\text{disp}}$   | -86.8  | -84.0  | <b>2.8</b>   | -84.7  | -68.0  | <b>16.7</b>  |
| $\Delta E_{\text{int}}$    | -383.1 | -395.6 | <b>-12.5</b> | -403.7 | -288.2 | <b>115.5</b> |
| $\Delta E_{\text{def}}$    | 18.0   | 19.7   | <b>1.7</b>   | 26.0   | 12.0   | <b>-14.0</b> |
| $\Delta E_{\text{bond}}$   | -365.1 | -375.9 | <b>-10.8</b> | -377.7 | -276.2 | <b>101.5</b> |

<sup>a</sup> Labeling of energy terms is the same as in Table S3.

**Table S5.** Gibbs free energy difference between *anti*- and *syn*-conformers with respect to the OH group rotation ( $\Delta G_{anti-syn}$ ), tautomerization Gibbs free energies ( $\Delta G_T$ , *syn*-lactim for **2PY** series and *anti*-lactim for **4PY** series), Gibbs free energies for proton transfer to water molecule in gas phase ( $\Delta G_{NH}$  and  $\Delta G_{OH}$ ) and increase/decrease of acidity relative to unsubstituted pyridone ( $\Delta\Delta G_{NH}$  and  $\Delta\Delta G_{OH}$ , *syn*-lactim for **2PY** series and *anti*-lactim for **4PY** series).

|                            | $\Delta G_{anti-syn}$ | $\Delta G_T$ | $\Delta G_{NH}$ | $\Delta G_{OH}$ | $\Delta\Delta G_{NH}$ | $\Delta\Delta G_{OH}$ |
|----------------------------|-----------------------|--------------|-----------------|-----------------|-----------------------|-----------------------|
| <b>2PY</b>                 | 5.42                  | -0.57        | 184.32          | 184.89          | /                     | /                     |
| <b>3Cl-2PY</b>             | 2.77                  | -0.30        | 175.91          | 176.20          | -8.4                  | -8.7                  |
| <b>4Cl-2PY</b>             | 5.41                  | -0.51        | 176.11          | 176.61          | -8.2                  | -8.3                  |
| <b>5Cl-2PY</b>             | 5.36                  | -2.16        | 175.54          | 177.70          | -8.8                  | -7.2                  |
| <b>6Cl-2PY</b>             | 5.23                  | -3.62        | 171.11          | 174.72          | -13.2                 | -10.2                 |
| <b>3F-2PY</b>              | 2.57                  | -0.25        | 177.85          | 178.10          | -6.5                  | -6.8                  |
| <b>4F-2PY</b>              | 5.52                  | -0.34        | 178.02          | 178.36          | -6.3                  | -6.5                  |
| <b>5F-2PY</b>              | 5.36                  | -2.91        | 178.48          | 181.39          | -5.8                  | -3.5                  |
| <b>6F-2PY</b>              | 4.98                  | -5.58        | 170.72          | 176.30          | -13.6                 | -8.6                  |
| <b>3NH<sub>2</sub>-2PY</b> | 5.35                  | 2.28         | 185.72          | 183.44          | 1.4                   | -1.5                  |
| <b>4NH<sub>2</sub>-2PY</b> | 5.78                  | 0.24         | 188.03          | 187.78          | 3.7                   | 2.9                   |
| <b>5NH<sub>2</sub>-2PY</b> | 5.18                  | -2.79        | 184.93          | 187.72          | 0.6                   | 2.8                   |
| <b>6NH<sub>2</sub>-2PY</b> | 4.60                  | -4.20        | 181.86          | 186.06          | -2.5                  | 1.2                   |
| <b>3NO<sub>2</sub>-2PY</b> | -3.40                 | -0.76        | 163.01          | 163.77          | -21.3                 | -21.1                 |
| <b>4NO<sub>2</sub>-2PY</b> | 5.16                  | -1.14        | 167.26          | 168.40          | -17.1                 | -16.5                 |
| <b>5NO<sub>2</sub>-2PY</b> | 5.54                  | -0.32        | 160.20          | 160.53          | -24.1                 | -24.4                 |
| <b>6NO<sub>2</sub>-2PY</b> | 5.43                  | -3.12        | 165.19          | 168.30          | -19.2                 | -16.6                 |
| <b>4PY</b>                 | /                     | -3.02        | 172.39          | 175.41          | /                     | /                     |
| <b>2Cl-4PY</b>             | 0.13                  | -5.59        | 160.96          | 166.54          | -11.4                 | -8.9                  |
| <b>3Cl-4PY</b>             | 2.73                  | -2.41        | 163.83          | 166.24          | -8.6                  | -9.2                  |
| <b>2F-4PY</b>              | 0.05                  | -7.84        | 160.53          | 168.37          | -11.9                 | -7.0                  |
| <b>3F-4PY</b>              | 2.54                  | -2.88        | 165.65          | 168.53          | -6.7                  | -6.9                  |
| <b>2NH<sub>2</sub>-4PY</b> | -0.32                 | -7.50        | 170.52          | 178.02          | -1.9                  | 2.6                   |
| <b>3NH<sub>2</sub>-4PY</b> | 0.80                  | -0.56        | 173.79          | 174.35          | 1.4                   | -1.1                  |
| <b>2NO<sub>2</sub>-4PY</b> | 0.00                  | -5.26        | 154.53          | 159.79          | -17.86                | -15.62                |
| <b>3NO<sub>2</sub>-4PY</b> | 9.3                   | -1.57        | 152.55          | 154.12          | -19.85                | -21.29                |

**Table S6.** Comparison of calculated, BHandHLYP/6-311+G(d,p), and experimental bond lengths of 6-chloro-2-hydroxypyridine (**6Cl-2HPY**) obtained by x-ray analysis.

| Bond                   | <b>6Cl-2HPY</b> |                   |
|------------------------|-----------------|-------------------|
|                        | Calc.           | Exp. <sup>a</sup> |
| N1C2                   | 1.313           | 1.341             |
| C2C3                   | 1.392           | 1.393             |
| C3C4                   | 1.375           | 1.377             |
| C4C5                   | 1.390           | 1.382             |
| C5C6                   | 1.377           | 1.362             |
| C2O                    | 1.339           | 1.321             |
| OH                     | 0.995           | 1.009             |
| C6Cl                   | 1.740           | 1.379             |
| <sup>a</sup> Ref. 23a. |                 |                   |

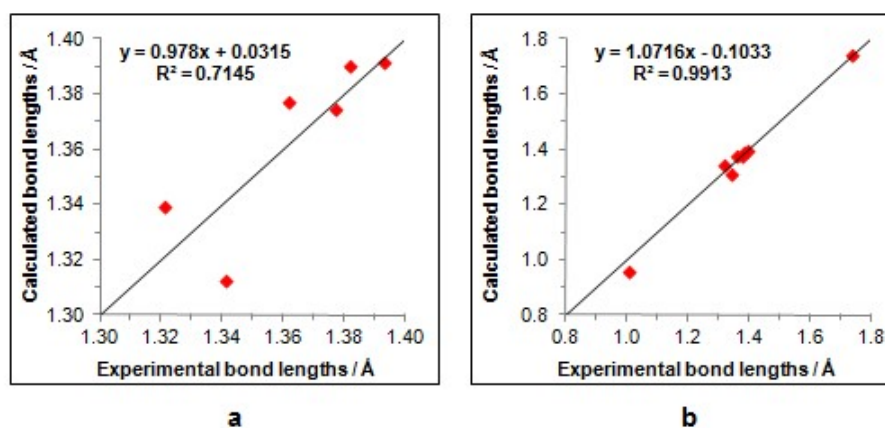

**Figure S4.** Correlation between calculated, BHandHLYP/6-311+G(d,p), and experimental<sup>23a</sup> bond lengths of 6-chloro-2-hydroxypyridine obtained by x-ray analysis (**a** - without the O–H and C–Cl bonds, **b** - including the O–H and C–Cl bonds).

**Absolute energies and x, y, z coordinates of the gas-phase optimized structures at the  
BHandHLYP/6-311+G(d,p) level of theory**

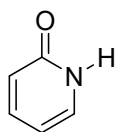

E = -323.4179709 a.u

| Center<br>Number | Atomic<br>Number | Atomic<br>Type | Coordinates (Angstroms) |           |          |
|------------------|------------------|----------------|-------------------------|-----------|----------|
|                  |                  |                | X                       | Y         | Z        |
| 1                | 6                | 0              | -0.044820               | -1.789985 | 0.000000 |
| 2                | 6                | 0              | 1.118847                | -1.112241 | 0.000000 |
| 3                | 6                | 0              | 0.000000                | 1.055737  | 0.000000 |
| 4                | 6                | 0              | -1.240839               | 0.313170  | 0.000000 |
| 5                | 6                | 0              | -1.252184               | -1.036293 | 0.000000 |
| 6                | 1                | 0              | -0.051587               | -2.862754 | 0.000000 |
| 7                | 1                | 0              | 2.081039                | -1.591293 | 0.000000 |
| 8                | 1                | 0              | 1.999846                | 0.740728  | 0.000000 |
| 9                | 1                | 0              | -2.143782               | 0.895274  | 0.000000 |
| 10               | 1                | 0              | -2.194067               | -1.559135 | 0.000000 |
| 11               | 7                | 0              | 1.128947                | 0.244492  | 0.000000 |
| 12               | 8                | 0              | 0.114988                | 2.260427  | 0.000000 |

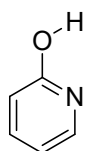

E = -323.4188639 a.u.

| Center<br>Number | Atomic<br>Number | Atomic<br>Type | Coordinates (Angstroms) |           |          |
|------------------|------------------|----------------|-------------------------|-----------|----------|
|                  |                  |                | X                       | Y         | Z        |
| 1                | 6                | 0              | 0.044133                | -1.804595 | 0.000000 |
| 2                | 6                | 0              | 1.184445                | -1.032580 | 0.000000 |
| 3                | 6                | 0              | 0.000000                | 0.896808  | 0.000000 |
| 4                | 6                | 0              | -1.218288               | 0.224205  | 0.000000 |
| 5                | 6                | 0              | -1.182029               | -1.149874 | 0.000000 |
| 6                | 1                | 0              | 0.109573                | -2.877168 | 0.000000 |
| 7                | 1                | 0              | 2.160098                | -1.490282 | 0.000000 |
| 8                | 1                | 0              | -2.137754               | 0.779593  | 0.000000 |
| 9                | 1                | 0              | -2.100497               | -1.711643 | 0.000000 |
| 10               | 7                | 0              | 1.167612                | 0.296832  | 0.000000 |
| 11               | 8                | 0              | -0.009230               | 2.236070  | 0.000000 |
| 12               | 1                | 0              | 0.899567                | 2.529326  | 0.000000 |



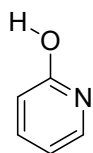

E = -323.4096785 a.u.

| Center Number | Atomic Number | Atomic Type | Coordinates (Angstroms) |           |          |
|---------------|---------------|-------------|-------------------------|-----------|----------|
|               |               |             | X                       | Y         | Z        |
| 1             | 6             | 0           | 0.118086                | -1.806760 | 0.000000 |
| 2             | 6             | 0           | 1.233336                | -0.993234 | 0.000000 |
| 3             | 6             | 0           | 0.000000                | 0.898908  | 0.000000 |
| 4             | 6             | 0           | -1.195475               | 0.182555  | 0.000000 |
| 5             | 6             | 0           | -1.124036               | -1.192673 | 0.000000 |
| 6             | 1             | 0           | 0.218879                | -2.876617 | 0.000000 |
| 7             | 1             | 0           | 2.222278                | -1.422579 | 0.000000 |
| 8             | 1             | 0           | -2.144567               | 0.691332  | 0.000000 |
| 9             | 1             | 0           | -2.027373               | -1.778371 | 0.000000 |
| 10            | 7             | 0           | 1.181959                | 0.331090  | 0.000000 |
| 11            | 8             | 0           | 0.016986                | 2.243756  | 0.000000 |
| 12            | 1             | 0           | -0.870282               | 2.585782  | 0.000000 |

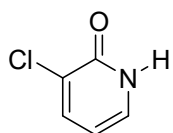

E = -783.0234971 a.u.

| Center Number | Atomic Number | Atomic Type | Coordinates (Angstroms) |           |          |
|---------------|---------------|-------------|-------------------------|-----------|----------|
|               |               |             | X                       | Y         | Z        |
| 1             | 6             | 0           | 2.085521                | 0.634204  | 0.000000 |
| 2             | 6             | 0           | 1.400884                | 1.792852  | 0.000000 |
| 3             | 6             | 0           | -0.766717               | 0.660684  | 0.000000 |
| 4             | 6             | 0           | 0.000000                | -0.576767 | 0.000000 |
| 5             | 6             | 0           | 1.348654                | -0.580461 | 0.000000 |
| 6             | 1             | 0           | 3.158073                | 0.630020  | 0.000000 |
| 7             | 1             | 0           | 1.869852                | 2.759444  | 0.000000 |
| 8             | 1             | 0           | -0.461601               | 2.652176  | 0.000000 |
| 9             | 1             | 0           | 1.871735                | -1.520724 | 0.000000 |
| 10            | 7             | 0           | 0.044458                | 1.786581  | 0.000000 |
| 11            | 8             | 0           | -1.966623               | 0.765256  | 0.000000 |
| 12            | 17            | 0           | -0.907431               | -2.043064 | 0.000000 |

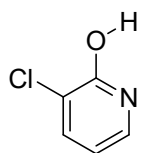

E = -783.0238777 a.u.

| Center Number | Atomic Number | Atomic Type | Coordinates (Angstroms) |           |          |
|---------------|---------------|-------------|-------------------------|-----------|----------|
|               |               |             | X                       | Y         | Z        |
| 1             | 6             | 0           | 2.125240                | 0.527361  | 0.000000 |
| 2             | 6             | 0           | 1.455927                | 1.730707  | 0.000000 |
| 3             | 6             | 0           | -0.580976               | 0.720130  | 0.000000 |
| 4             | 6             | 0           | 0.000000                | -0.548812 | 0.000000 |
| 5             | 6             | 0           | 1.370924                | -0.637111 | 0.000000 |
| 6             | 1             | 0           | 3.199093                | 0.493101  | 0.000000 |
| 7             | 1             | 0           | 1.993271                | 2.664209  | 0.000000 |
| 8             | 1             | 0           | 1.839538                | -1.605174 | 0.000000 |
| 9             | 7             | 0           | 0.131773                | 1.821506  | 0.000000 |
| 10            | 8             | 0           | -1.908291               | 0.830672  | 0.000000 |
| 11            | 17            | 0           | -0.988064               | -1.968492 | 0.000000 |
| 12            | 1             | 0           | -2.117579               | 1.762677  | 0.000000 |

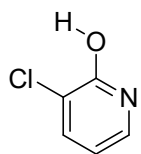

E = -783.0191915 a.u.

| Center Number | Atomic Number | Atomic Type | Coordinates (Angstroms) |           |          |
|---------------|---------------|-------------|-------------------------|-----------|----------|
|               |               |             | X                       | Y         | Z        |
| 1             | 6             | 0           | 2.145583                | 0.487039  | 0.000000 |
| 2             | 6             | 0           | 1.497580                | 1.706020  | 0.000000 |
| 3             | 6             | 0           | -0.563278               | 0.757160  | 0.000000 |
| 4             | 6             | 0           | 0.000000                | -0.521626 | 0.000000 |
| 5             | 6             | 0           | 1.366989                | -0.657299 | 0.000000 |
| 6             | 1             | 0           | 3.218483                | 0.430349  | 0.000000 |
| 7             | 1             | 0           | 2.059983                | 2.625215  | 0.000000 |
| 8             | 1             | 0           | 1.808256                | -1.638063 | 0.000000 |
| 9             | 7             | 0           | 0.180720                | 1.836668  | 0.000000 |
| 10            | 8             | 0           | -1.881994               | 0.956824  | 0.000000 |
| 11            | 17            | 0           | -1.037235               | -1.922291 | 0.000000 |
| 12            | 1             | 0           | -2.344060               | 0.122419  | 0.000000 |

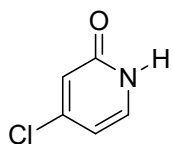

E = -783.0274918 a.u.

| Center Number | Atomic Number | Atomic Type | Coordinates (Angstroms) |           |          |
|---------------|---------------|-------------|-------------------------|-----------|----------|
|               |               |             | X                       | Y         | Z        |
| 1             | 6             | 0           | -1.386790               | 0.486545  | 0.000000 |
| 2             | 6             | 0           | -1.717901               | -0.818170 | 0.000000 |
| 3             | 6             | 0           | 0.605089                | -1.548155 | 0.000000 |
| 4             | 6             | 0           | 0.957229                | -0.145648 | 0.000000 |
| 5             | 6             | 0           | 0.000000                | 0.801651  | 0.000000 |
| 6             | 1             | 0           | -2.133909               | 1.254516  | 0.000000 |
| 7             | 1             | 0           | -2.737580               | -1.157319 | 0.000000 |
| 8             | 1             | 0           | -1.028056               | -2.749251 | 0.000000 |
| 9             | 1             | 0           | 2.003231                | 0.093776  | 0.000000 |
| 10            | 7             | 0           | -0.766491               | -1.781643 | 0.000000 |
| 11            | 8             | 0           | 1.381962                | -2.473056 | 0.000000 |
| 12            | 17            | 0           | 0.438841                | 2.479817  | 0.000000 |

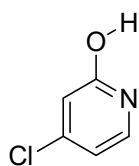

E = -783.0282849 a.u.

| Center Number | Atomic Number | Atomic Type | Coordinates (Angstroms) |           |          |
|---------------|---------------|-------------|-------------------------|-----------|----------|
|               |               |             | X                       | Y         | Z        |
| 1             | 6             | 0           | -1.364454               | 0.573346  | 0.000000 |
| 2             | 6             | 0           | -1.754339               | -0.746989 | 0.000000 |
| 3             | 6             | 0           | 0.378396                | -1.495694 | 0.000000 |
| 4             | 6             | 0           | 0.903783                | -0.206907 | 0.000000 |
| 5             | 6             | 0           | 0.000000                | 0.825484  | 0.000000 |
| 6             | 1             | 0           | -2.082589               | 1.370805  | 0.000000 |
| 7             | 1             | 0           | -2.801218               | -1.001613 | 0.000000 |
| 8             | 1             | 0           | 1.964688                | -0.046409 | 0.000000 |
| 9             | 7             | 0           | -0.905883               | -1.768727 | 0.000000 |
| 10            | 8             | 0           | 1.233810                | -2.521967 | 0.000000 |
| 11            | 17            | 0           | 0.569940                | 2.462714  | 0.000000 |
| 12            | 1             | 0           | 0.720530                | -3.327533 | 0.000000 |

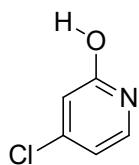

E = -783.0191302 a.u.

| Center Number | Atomic Number | Atomic Type | Coordinates (Angstroms) |           |          |
|---------------|---------------|-------------|-------------------------|-----------|----------|
|               |               |             | X                       | Y         | Z        |
| 1             | 6             | 0           | -1.365034               | 0.601076  | 0.000000 |
| 2             | 6             | 0           | -1.780796               | -0.715297 | 0.000000 |
| 3             | 6             | 0           | 0.326275                | -1.519755 | 0.000000 |
| 4             | 6             | 0           | 0.876110                | -0.238921 | 0.000000 |
| 5             | 6             | 0           | 0.000000                | 0.820851  | 0.000000 |
| 6             | 1             | 0           | -2.066668               | 1.413156  | 0.000000 |
| 7             | 1             | 0           | -2.834122               | -0.943835 | 0.000000 |
| 8             | 1             | 0           | 1.939370                | -0.079121 | 0.000000 |
| 9             | 7             | 0           | -0.963758               | -1.756824 | 0.000000 |
| 10            | 8             | 0           | 1.104090                | -2.612742 | 0.000000 |
| 11            | 17            | 0           | 0.618328                | 2.440765  | 0.000000 |
| 12            | 1             | 0           | 2.024098                | -2.371219 | 0.000000 |

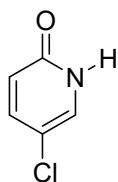

E = -783.0224591 a.u.

| Center Number | Atomic Number | Atomic Type | Coordinates (Angstroms) |           |          |
|---------------|---------------|-------------|-------------------------|-----------|----------|
|               |               |             | X                       | Y         | Z        |
| 1             | 6             | 0           | 0.000000                | -0.916454 | 0.000000 |
| 2             | 6             | 0           | 1.150700                | -0.222220 | 0.000000 |
| 3             | 6             | 0           | -0.028401               | 1.916908  | 0.000000 |
| 4             | 6             | 0           | -1.250085               | 1.139451  | 0.000000 |
| 5             | 6             | 0           | -1.232912               | -0.207881 | 0.000000 |
| 6             | 1             | 0           | 2.118313                | -0.687664 | 0.000000 |
| 7             | 1             | 0           | 1.980060                | 1.650553  | 0.000000 |
| 8             | 1             | 0           | -2.169494               | 1.694874  | 0.000000 |
| 9             | 1             | 0           | -2.152481               | -0.766873 | 0.000000 |
| 10            | 7             | 0           | 1.120038                | 1.135317  | 0.000000 |
| 11            | 8             | 0           | 0.050168                | 3.122751  | 0.000000 |
| 12            | 17            | 0           | 0.008599                | -2.651702 | 0.000000 |

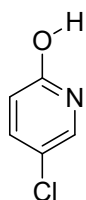

E = -783.0259329 a.u.

| Center Number | Atomic Number | Atomic Type | Coordinates (Angstroms) |           |          |
|---------------|---------------|-------------|-------------------------|-----------|----------|
|               |               |             | X                       | Y         | Z        |
| 1             | 6             | 0           | 0.000000                | -0.927088 | 0.000000 |
| 2             | 6             | 0           | 1.155219                | -0.179971 | 0.000000 |
| 3             | 6             | 0           | -0.016818               | 1.762369  | 0.000000 |
| 4             | 6             | 0           | -1.240550               | 1.099531  | 0.000000 |
| 5             | 6             | 0           | -1.223592               | -0.273819 | 0.000000 |
| 6             | 1             | 0           | 2.119424                | -0.658752 | 0.000000 |
| 7             | 1             | 0           | -2.157260               | 1.659172  | 0.000000 |
| 8             | 1             | 0           | -2.139736               | -0.836987 | 0.000000 |
| 9             | 7             | 0           | 1.142055                | 1.147060  | 0.000000 |
| 10            | 8             | 0           | -0.014238               | 3.099877  | 0.000000 |
| 11            | 17            | 0           | 0.079765                | -2.662830 | 0.000000 |
| 12            | 1             | 0           | 0.895545                | 3.390114  | 0.000000 |

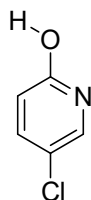

E = -783.0168101 a.u.

| Center Number | Atomic Number | Atomic Type | Coordinates (Angstroms) |           |          |
|---------------|---------------|-------------|-------------------------|-----------|----------|
|               |               |             | X                       | Y         | Z        |
| 1             | 6             | 0           | 0.000000                | -0.931154 | 0.000000 |
| 2             | 6             | 0           | 1.164789                | -0.191653 | 0.000000 |
| 3             | 6             | 0           | 0.025643                | 1.764991  | 0.000000 |
| 4             | 6             | 0           | -1.204653               | 1.111188  | 0.000000 |
| 5             | 6             | 0           | -1.211539               | -0.265586 | 0.000000 |
| 6             | 1             | 0           | 2.122676                | -0.684261 | 0.000000 |
| 7             | 1             | 0           | -2.128366               | 1.663813  | 0.000000 |
| 8             | 1             | 0           | -2.136965               | -0.813329 | 0.000000 |
| 9             | 7             | 0           | 1.173526                | 1.130890  | 0.000000 |
| 10            | 8             | 0           | 0.118804                | 3.104655  | 0.000000 |
| 11            | 17            | 0           | 0.063402                | -2.667462 | 0.000000 |
| 12            | 1             | 0           | -0.745739               | 3.500441  | 0.000000 |

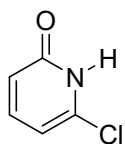

E = -783.0244539 a.u.

| Center Number | Atomic Number | Atomic Type | Coordinates (Angstroms) |           |          |
|---------------|---------------|-------------|-------------------------|-----------|----------|
|               |               |             | X                       | Y         | Z        |
| 1             | 6             | 0           | 1.340170                | -0.691250 | 0.000000 |
| 2             | 6             | 0           | 0.000000                | -0.795846 | 0.000000 |
| 3             | 6             | 0           | -0.335581               | 1.618396  | 0.000000 |
| 4             | 6             | 0           | 1.105589                | 1.724066  | 0.000000 |
| 5             | 6             | 0           | 1.885285                | 0.624149  | 0.000000 |
| 6             | 1             | 0           | 1.960118                | -1.565126 | 0.000000 |
| 7             | 1             | 0           | -1.792952               | 0.191172  | 0.000000 |
| 8             | 1             | 0           | 1.512126                | 2.717987  | 0.000000 |
| 9             | 1             | 0           | 2.956813                | 0.731875  | 0.000000 |
| 10            | 7             | 0           | -0.795601               | 0.298745  | 0.000000 |
| 11            | 8             | 0           | -1.127479               | 2.528797  | 0.000000 |
| 12            | 17            | 0           | -0.824697               | -2.310270 | 0.000000 |

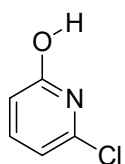

E = -783.030405 a.u.

| Center Number | Atomic Number | Atomic Type | Coordinates (Angstroms) |           |          |
|---------------|---------------|-------------|-------------------------|-----------|----------|
|               |               |             | X                       | Y         | Z        |
| 1             | 6             | 0           | 1.371367                | -0.635844 | 0.000000 |
| 2             | 6             | 0           | 0.000000                | -0.770844 | 0.000000 |
| 3             | 6             | 0           | -0.352300               | 1.453297  | 0.000000 |
| 4             | 6             | 0           | 1.008295                | 1.732878  | 0.000000 |
| 5             | 6             | 0           | 1.869007                | 0.659297  | 0.000000 |
| 6             | 1             | 0           | 2.012063                | -1.496020 | 0.000000 |
| 7             | 1             | 0           | 1.349711                | 2.750560  | 0.000000 |
| 8             | 1             | 0           | 2.933049                | 0.822687  | 0.000000 |
| 9             | 7             | 0           | -0.845797               | 0.233043  | 0.000000 |
| 10            | 8             | 0           | -1.220634               | 2.467519  | 0.000000 |
| 11            | 17            | 0           | -0.699100               | -2.363686 | 0.000000 |
| 12            | 1             | 0           | -2.102692               | 2.101286  | 0.000000 |

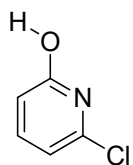

E = -783.0215614 a.u.

| Center Number | Atomic Number | Atomic Type | Coordinates (Angstroms) |           |          |
|---------------|---------------|-------------|-------------------------|-----------|----------|
|               |               |             | X                       | Y         | Z        |
| 1             | 6             | 0           | 1.373131                | -0.626114 | 0.000000 |
| 2             | 6             | 0           | 0.000000                | -0.777065 | 0.000000 |
| 3             | 6             | 0           | -0.394856               | 1.434856  | 0.000000 |
| 4             | 6             | 0           | 0.964386                | 1.730212  | 0.000000 |
| 5             | 6             | 0           | 1.848918                | 0.672645  | 0.000000 |
| 6             | 1             | 0           | 2.025835                | -1.477250 | 0.000000 |
| 7             | 1             | 0           | 1.310867                | 2.748937  | 0.000000 |
| 8             | 1             | 0           | 2.909297                | 0.857410  | 0.000000 |
| 9             | 7             | 0           | -0.861939               | 0.205998  | 0.000000 |
| 10            | 8             | 0           | -1.335370               | 2.389665  | 0.000000 |
| 11            | 17            | 0           | -0.667284               | -2.385185 | 0.000000 |
| 12            | 1             | 0           | -0.935117               | 3.252545  | 0.000000 |

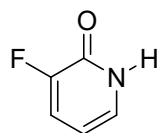

E = -422.6449526 a.u.

| Center Number | Atomic Number | Atomic Type | Coordinates (Angstroms) |           |          |
|---------------|---------------|-------------|-------------------------|-----------|----------|
|               |               |             | X                       | Y         | Z        |
| 1             | 6             | 0           | 1.852393                | 0.610258  | 0.000000 |
| 2             | 6             | 0           | 0.988524                | 1.640365  | 0.000000 |
| 3             | 6             | 0           | -0.966232               | 0.171957  | 0.000000 |
| 4             | 6             | 0           | 0.000000                | -0.911095 | 0.000000 |
| 5             | 6             | 0           | 1.326726                | -0.713053 | 0.000000 |
| 6             | 1             | 0           | 2.910821                | 0.783378  | 0.000000 |
| 7             | 1             | 0           | 1.292888                | 2.670317  | 0.000000 |
| 8             | 1             | 0           | -0.992619               | 2.185547  | 0.000000 |
| 9             | 1             | 0           | 1.982416                | -1.566546 | 0.000000 |
| 10            | 7             | 0           | -0.353406               | 1.413117  | 0.000000 |
| 11            | 8             | 0           | -2.165807               | 0.054669  | 0.000000 |
| 12            | 9             | 0           | -0.511296               | -2.132496 | 0.000000 |

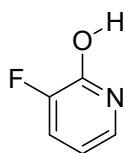

E = -422.6452294 a.u.

| Center Number | Atomic Number | Atomic Type | Coordinates (Angstroms) |           |          |
|---------------|---------------|-------------|-------------------------|-----------|----------|
|               |               |             | X                       | Y         | Z        |
| 1             | 6             | 0           | 1.097363                | 1.629429  | 0.000000 |
| 2             | 6             | 0           | 1.845379                | 0.474763  | 0.000000 |
| 3             | 6             | 0           | 0.000000                | -0.853830 | 0.000000 |
| 4             | 6             | 0           | -0.834844               | 0.260731  | 0.000000 |
| 5             | 6             | 0           | -0.288168               | 1.512066  | 0.000000 |
| 6             | 1             | 0           | 1.572203                | 2.593147  | 0.000000 |
| 7             | 1             | 0           | 2.921513                | 0.511861  | 0.000000 |
| 8             | 1             | 0           | -0.936149               | 2.370902  | 0.000000 |
| 9             | 7             | 0           | 1.303773                | -0.740054 | 0.000000 |
| 10            | 8             | 0           | -0.548228               | -2.069185 | 0.000000 |
| 11            | 1             | 0           | 0.163914                | -2.705757 | 0.000000 |
| 12            | 9             | 0           | -2.153384               | 0.091639  | 0.000000 |

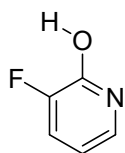

E = -422.6409337 a.u.

| Center Number | Atomic Number | Atomic Type | Coordinates (Angstroms) |           |          |
|---------------|---------------|-------------|-------------------------|-----------|----------|
|               |               |             | X                       | Y         | Z        |
| 1             | 6             | 0           | -1.893061               | 0.557289  | 0.000000 |
| 2             | 6             | 0           | -1.018863               | 1.623791  | 0.000000 |
| 3             | 6             | 0           | 0.811062                | 0.290320  | 0.000000 |
| 4             | 6             | 0           | 0.000000                | -0.840103 | 0.000000 |
| 5             | 6             | 0           | -1.358964               | -0.724706 | 0.000000 |
| 6             | 1             | 0           | -2.955673               | 0.715852  | 0.000000 |
| 7             | 1             | 0           | -1.390124               | 2.634952  | 0.000000 |
| 8             | 1             | 0           | -1.973443               | -1.607632 | 0.000000 |
| 9             | 7             | 0           | 0.302248                | 1.493571  | 0.000000 |
| 10            | 8             | 0           | 2.144272                | 0.184125  | 0.000000 |
| 11            | 1             | 0           | 2.398471                | -0.734819 | 0.000000 |
| 12            | 9             | 0           | 0.601090                | -2.041766 | 0.000000 |



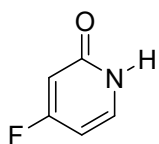

E = -422.6531069 a.u.

| Center Number | Atomic Number | Atomic Type | Coordinates (Angstroms) |           |          |
|---------------|---------------|-------------|-------------------------|-----------|----------|
|               |               |             | X                       | Y         | Z        |
| 1             | 6             | 0           | -1.183104               | -1.055690 | 0.000000 |
| 2             | 6             | 0           | 0.003887                | -1.691717 | 0.000000 |
| 3             | 6             | 0           | 1.272404                | 0.392323  | 0.000000 |
| 4             | 6             | 0           | 0.000000                | 1.071296  | 0.000000 |
| 5             | 6             | 0           | -1.140115               | 0.359868  | 0.000000 |
| 6             | 1             | 0           | -2.116833               | -1.581993 | 0.000000 |
| 7             | 1             | 0           | 0.088955                | -2.762772 | 0.000000 |
| 8             | 1             | 0           | 2.042708                | -1.484716 | 0.000000 |
| 9             | 1             | 0           | -0.001472               | 2.144448  | 0.000000 |
| 10            | 7             | 0           | 1.166090                | -0.998889 | 0.000000 |
| 11            | 8             | 0           | 2.361121                | 0.915301  | 0.000000 |
| 12            | 9             | 0           | -2.309266               | 0.988708  | 0.000000 |

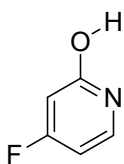

E = -422.6537432 a.u.

| Center Number | Atomic Number | Atomic Type | Coordinates (Angstroms) |           |          |
|---------------|---------------|-------------|-------------------------|-----------|----------|
|               |               |             | X                       | Y         | Z        |
| 1             | 6             | 0           | 1.198363                | -1.058873 | 0.000000 |
| 2             | 6             | 0           | -0.025230               | -1.689834 | 0.000000 |
| 3             | 6             | 0           | -1.164208               | 0.265225  | 0.000000 |
| 4             | 6             | 0           | 0.000000                | 1.025749  | 0.000000 |
| 5             | 6             | 0           | 1.174216                | 0.323623  | 0.000000 |
| 6             | 1             | 0           | 2.125310                | -1.600160 | 0.000000 |
| 7             | 1             | 0           | -0.079192               | -2.765702 | 0.000000 |
| 8             | 1             | 0           | -0.025741               | 2.098577  | 0.000000 |
| 9             | 7             | 0           | -1.188657               | -1.048798 | 0.000000 |
| 10            | 8             | 0           | -2.334991               | 0.907959  | 0.000000 |
| 11            | 1             | 0           | -3.026472               | 0.248954  | 0.000000 |
| 12            | 9             | 0           | 2.323086                | 0.988990  | 0.000000 |

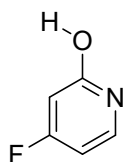

E = -422.644437 a.u.

| Center Number | Atomic Number | Atomic Type | Coordinates (Angstroms) |           |          |
|---------------|---------------|-------------|-------------------------|-----------|----------|
|               |               |             | X                       | Y         | Z        |
| 1             | 6             | 0           | 1.187723                | -1.084828 | 0.000000 |
| 2             | 6             | 0           | -0.046958               | -1.701901 | 0.000000 |
| 3             | 6             | 0           | -1.176200               | 0.253070  | 0.000000 |
| 4             | 6             | 0           | 0.000000                | 1.000073  | 0.000000 |
| 5             | 6             | 0           | 1.174454                | 0.293043  | 0.000000 |
| 6             | 1             | 0           | 2.108775                | -1.636143 | 0.000000 |
| 7             | 1             | 0           | -0.107867               | -2.777823 | 0.000000 |
| 8             | 1             | 0           | 0.007225                | 2.075387  | 0.000000 |
| 9             | 7             | 0           | -1.204749               | -1.058957 | 0.000000 |
| 10            | 8             | 0           | -2.379004               | 0.846138  | 0.000000 |
| 11            | 1             | 0           | -2.287306               | 1.792839  | 0.000000 |
| 12            | 9             | 0           | 2.323370                | 0.959177  | 0.000000 |

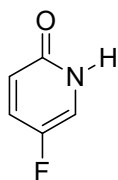

E = -422.64291 a.u.

| Center Number | Atomic Number | Atomic Type | Coordinates (Angstroms) |           |          |
|---------------|---------------|-------------|-------------------------|-----------|----------|
|               |               |             | X                       | Y         | Z        |
| 1             | 6             | 0           | -1.129083               | 0.706154  | 0.000000 |
| 2             | 6             | 0           | -1.170894               | -0.631868 | 0.000000 |
| 3             | 6             | 0           | 1.269451                | -0.770536 | 0.000000 |
| 4             | 6             | 0           | 1.262671                | 0.679440  | 0.000000 |
| 5             | 6             | 0           | 0.112953                | 1.383076  | 0.000000 |
| 6             | 1             | 0           | -2.088191               | -1.189472 | 0.000000 |
| 7             | 1             | 0           | -0.019858               | -2.330467 | 0.000000 |
| 8             | 1             | 0           | 2.223222                | 1.159902  | 0.000000 |
| 9             | 1             | 0           | 0.114379                | 2.459693  | 0.000000 |
| 10            | 7             | 0           | 0.000000                | -1.328526 | 0.000000 |
| 11            | 8             | 0           | 2.252993                | -1.474598 | 0.000000 |
| 12            | 9             | 0           | -2.258231               | 1.422134  | 0.000000 |

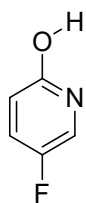

E = -422.6476105 a.u.

| Center Number | Atomic Number | Atomic Type | Coordinates (Angstroms) |           |          |
|---------------|---------------|-------------|-------------------------|-----------|----------|
|               |               |             | X                       | Y         | Z        |
| 1             | 6             | 0           | -1.185358               | -0.636408 | 0.000000 |
| 2             | 6             | 0           | 0.000000                | -1.323209 | 0.000000 |
| 3             | 6             | 0           | 1.176954                | 0.617479  | 0.000000 |
| 4             | 6             | 0           | 0.021988                | 1.394958  | 0.000000 |
| 5             | 6             | 0           | -1.188759               | 0.744435  | 0.000000 |
| 6             | 1             | 0           | 0.009123                | -2.399977 | 0.000000 |
| 7             | 1             | 0           | 0.094424                | 2.466487  | 0.000000 |
| 8             | 1             | 0           | -2.120460               | 1.282070  | 0.000000 |
| 9             | 7             | 0           | 1.170073                | -0.693811 | 0.000000 |
| 10            | 8             | 0           | 2.364141                | 1.238892  | 0.000000 |
| 11            | 1             | 0           | 3.043937                | 0.568620  | 0.000000 |
| 12            | 9             | 0           | -2.342179               | -1.306132 | 0.000000 |

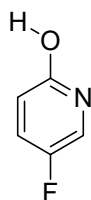

E = -422.6384543 a.u.

| Center Number | Atomic Number | Atomic Type | Coordinates (Angstroms) |           |          |
|---------------|---------------|-------------|-------------------------|-----------|----------|
|               |               |             | X                       | Y         | Z        |
| 1             | 6             | 0           | 0.049169                | -1.349345 | 0.000000 |
| 2             | 6             | 0           | 1.195654                | -0.592183 | 0.000000 |
| 3             | 6             | 0           | 0.000000                | 1.331525  | 0.000000 |
| 4             | 6             | 0           | -1.211668               | 0.643577  | 0.000000 |
| 5             | 6             | 0           | -1.181904               | -0.734224 | 0.000000 |
| 6             | 1             | 0           | 2.161313                | -1.070144 | 0.000000 |
| 7             | 1             | 0           | -2.149973               | 1.170928  | 0.000000 |
| 8             | 1             | 0           | -2.083734               | -1.320471 | 0.000000 |
| 9             | 7             | 0           | 1.165351                | 0.731138  | 0.000000 |
| 10            | 8             | 0           | 0.054316                | 2.675998  | 0.000000 |
| 11            | 1             | 0           | -0.821497               | 3.045683  | 0.000000 |
| 12            | 9             | 0           | 0.132711                | -2.683116 | 0.000000 |

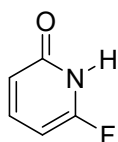

E = -422.6511446 a.u.

| Center Number | Atomic Number | Atomic Type | Coordinates (Angstroms) |           |          |
|---------------|---------------|-------------|-------------------------|-----------|----------|
|               |               |             | X                       | Y         | Z        |
| 1             | 6             | 0           | 1.174014                | -1.105842 | 0.000000 |
| 2             | 6             | 0           | 1.143465                | 0.234082  | 0.000000 |
| 3             | 6             | 0           | -1.280063               | 0.368926  | 0.000000 |
| 4             | 6             | 0           | -1.256442               | -1.074863 | 0.000000 |
| 5             | 6             | 0           | -0.091490               | -1.756683 | 0.000000 |
| 6             | 1             | 0           | 2.106141                | -1.634244 | 0.000000 |
| 7             | 1             | 0           | 0.041330                | 1.943501  | 0.000000 |
| 8             | 1             | 0           | -2.210014               | -1.568048 | 0.000000 |
| 9             | 1             | 0           | -0.109505               | -2.833275 | 0.000000 |
| 10            | 7             | 0           | 0.000000                | 0.940437  | 0.000000 |
| 11            | 8             | 0           | -2.252224               | 1.082456  | 0.000000 |
| 12            | 9             | 0           | 2.228104                | 0.983960  | 0.000000 |

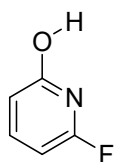

E = -422.6603817 a.u.

| Center Number | Atomic Number | Atomic Type | Coordinates (Angstroms) |           |          |
|---------------|---------------|-------------|-------------------------|-----------|----------|
|               |               |             | X                       | Y         | Z        |
| 1             | 6             | 0           | 1.210812                | -1.072021 | 0.000000 |
| 2             | 6             | 0           | 1.112044                | 0.299532  | 0.000000 |
| 3             | 6             | 0           | -1.128027               | 0.299239  | 0.000000 |
| 4             | 6             | 0           | -1.186965               | -1.087677 | 0.000000 |
| 5             | 6             | 0           | 0.011629                | -1.767560 | 0.000000 |
| 6             | 1             | 0           | 2.168907                | -1.554854 | 0.000000 |
| 7             | 1             | 0           | -2.136886               | -1.587019 | 0.000000 |
| 8             | 1             | 0           | 0.017956                | -2.843931 | 0.000000 |
| 9             | 7             | 0           | 0.000000                | 0.981339  | 0.000000 |
| 10            | 8             | 0           | -2.266311               | 0.996512  | 0.000000 |
| 11            | 1             | 0           | -2.046058               | 1.925738  | 0.000000 |
| 12            | 9             | 0           | 2.223290                | 1.021058  | 0.000000 |

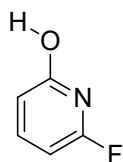

E = -422.6519767 a.u.

| Center Number | Atomic Number | Atomic Type | Coordinates (Angstroms) |           |          |
|---------------|---------------|-------------|-------------------------|-----------|----------|
|               |               |             | X                       | Y         | Z        |
| 1             | 6             | 0           | -1.235511               | 1.045152  | 0.000000 |
| 2             | 6             | 0           | -1.113706               | -0.328042 | 0.000000 |
| 3             | 6             | 0           | 1.121244                | -0.308097 | 0.000000 |
| 4             | 6             | 0           | 1.156916                | 1.081783  | 0.000000 |
| 5             | 6             | 0           | -0.049153               | 1.753772  | 0.000000 |
| 6             | 1             | 0           | -2.200488               | 1.514207  | 0.000000 |
| 7             | 1             | 0           | 2.092599                | 1.612604  | 0.000000 |
| 8             | 1             | 0           | -0.064372               | 2.829883  | 0.000000 |
| 9             | 7             | 0           | 0.000000                | -0.997622 | 0.000000 |
| 10            | 8             | 0           | 2.233974                | -1.053814 | 0.000000 |
| 11            | 1             | 0           | 3.006771                | -0.499200 | 0.000000 |
| 12            | 9             | 0           | -2.220560               | -1.056782 | 0.000000 |

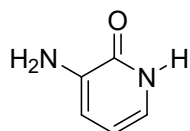

E = -378.765554 a.u.

| Center Number | Atomic Number | Atomic Type | Coordinates (Angstroms) |           |           |
|---------------|---------------|-------------|-------------------------|-----------|-----------|
|               |               |             | X                       | Y         | Z         |
| 1             | 6             | 0           | -0.660829               | -0.642025 | -0.010713 |
| 2             | 6             | 0           | 0.426385                | -1.453610 | 0.001877  |
| 3             | 6             | 0           | -0.488074               | 0.808419  | -0.003013 |
| 4             | 6             | 0           | 1.743530                | -0.917596 | 0.008936  |
| 5             | 1             | 0           | 0.293026                | -2.522808 | -0.002823 |
| 6             | 7             | 0           | -1.967591               | -1.049368 | -0.069144 |
| 7             | 7             | 0           | 0.812187                | 1.230447  | -0.006217 |
| 8             | 8             | 0           | -1.420526               | 1.590082  | 0.014205  |
| 9             | 6             | 0           | 1.911406                | 0.414978  | 0.001050  |
| 10            | 1             | 0           | 2.597282                | -1.568339 | 0.015454  |
| 11            | 1             | 0           | -2.191134               | -1.959402 | 0.275138  |
| 12            | 1             | 0           | -2.633711               | -0.329358 | 0.135670  |
| 13            | 1             | 0           | 0.925832                | 2.226016  | 0.000511  |
| 14            | 1             | 0           | 2.866235                | 0.904679  | 0.001124  |

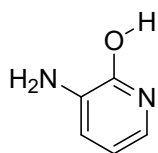

E = -378.7615651 a.u.

| Center Number | Atomic Number | Atomic Type | Coordinates (Angstroms) |           |           |
|---------------|---------------|-------------|-------------------------|-----------|-----------|
|               |               |             | X                       | Y         | Z         |
| 1             | 6             | 0           | 0.555473                | 0.688101  | -0.009387 |
| 2             | 6             | 0           | -0.621553               | 1.405663  | -0.004594 |
| 3             | 6             | 0           | 0.424266                | -0.708567 | -0.004213 |
| 4             | 6             | 0           | -1.840535               | 0.736511  | 0.004551  |
| 5             | 1             | 0           | -0.589209               | 2.482633  | -0.013851 |
| 6             | 7             | 0           | 1.812621                | 1.262719  | -0.071870 |
| 7             | 7             | 0           | -0.710358               | -1.345740 | 0.003260  |
| 8             | 8             | 0           | 1.568332                | -1.423013 | 0.001265  |
| 9             | 6             | 0           | -1.840362               | -0.637206 | 0.005682  |
| 10            | 1             | 0           | -2.766467               | 1.282822  | 0.007921  |
| 11            | 1             | 0           | 1.891221                | 2.182861  | 0.311573  |
| 12            | 1             | 0           | 2.565320                | 0.657586  | 0.190332  |
| 13            | 1             | 0           | -2.757567               | -1.200314 | 0.010474  |
| 14            | 1             | 0           | 1.330464                | -2.347343 | 0.011463  |

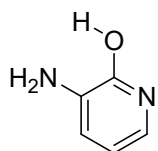

E = -378.7526445 a.u.

| Center Number | Atomic Number | Atomic Type | Coordinates (Angstroms) |           |           |
|---------------|---------------|-------------|-------------------------|-----------|-----------|
|               |               |             | X                       | Y         | Z         |
| 1             | 6             | 0           | 0.000000                | 0.839891  | 0.000000  |
| 2             | 6             | 0           | 1.365784                | 0.673278  | 0.000000  |
| 3             | 6             | 0           | -0.795828               | -0.315660 | 0.000000  |
| 4             | 6             | 0           | 1.896124                | -0.608757 | 0.000000  |
| 5             | 1             | 0           | 2.009651                | 1.537747  | 0.000000  |
| 6             | 7             | 0           | -0.686533               | 2.091851  | 0.000000  |
| 7             | 7             | 0           | -0.305927               | -1.531981 | 0.000000  |
| 8             | 8             | 0           | -2.123120               | -0.193919 | 0.000000  |
| 9             | 6             | 0           | 1.012704                | -1.668666 | 0.000000  |
| 10            | 1             | 0           | 2.957593                | -0.777221 | 0.000000  |
| 11            | 1             | 0           | -0.487590               | 2.643412  | 0.816330  |
| 12            | 1             | 0           | -0.487590               | 2.643412  | -0.816330 |
| 13            | 1             | 0           | 1.378765                | -2.682749 | 0.000000  |
| 14            | 1             | 0           | -2.311362               | 0.747159  | 0.000000  |

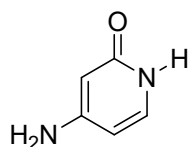

E = -378.7680981 a.u.

| Center Number | Atomic Number | Atomic Type | Coordinates (Angstroms) |           |           |
|---------------|---------------|-------------|-------------------------|-----------|-----------|
|               |               |             | X                       | Y         | Z         |
| 1             | 6             | 0           | 0.068248                | -1.046167 | -0.002659 |
| 2             | 6             | 0           | 1.181067                | -0.257007 | -0.005695 |
| 3             | 6             | 0           | -1.252934               | -0.498167 | 0.000299  |
| 4             | 6             | 0           | 1.043383                | 1.168227  | -0.003752 |
| 5             | 7             | 0           | -1.290185               | 0.899327  | 0.004331  |
| 6             | 8             | 0           | -2.295365               | -1.118603 | 0.003567  |
| 7             | 6             | 0           | -0.195431               | 1.690522  | 0.001936  |
| 8             | 1             | 0           | 1.905437                | 1.808415  | -0.016772 |
| 9             | 1             | 0           | -2.209083               | 1.297244  | 0.008466  |
| 10            | 1             | 0           | -0.373544               | 2.750747  | 0.003406  |
| 11            | 1             | 0           | 0.139544                | -2.118802 | -0.006102 |
| 12            | 7             | 0           | 2.444278                | -0.781600 | -0.054280 |
| 13            | 1             | 0           | 3.203313                | -0.204096 | 0.240733  |
| 14            | 1             | 0           | 2.552600                | -1.753221 | 0.150609  |

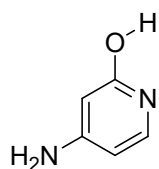

E = -378.767834 a.u.

| Center Number | Atomic Number | Atomic Type | Coordinates (Angstroms) |           |           |
|---------------|---------------|-------------|-------------------------|-----------|-----------|
|               |               |             | X                       | Y         | Z         |
| 1             | 6             | 0           | 0.038483                | -1.001619 | -0.005819 |
| 2             | 6             | 0           | 1.204934                | -0.253495 | -0.007609 |
| 3             | 6             | 0           | -1.168506               | -0.322955 | 0.000374  |
| 4             | 6             | 0           | 1.089042                | 1.143046  | -0.003601 |
| 5             | 7             | 0           | -1.294691               | 0.986441  | 0.005587  |
| 6             | 8             | 0           | -2.297433               | -1.045473 | 0.003167  |
| 7             | 6             | 0           | -0.167553               | 1.693043  | 0.003413  |
| 8             | 1             | 0           | 1.962032                | 1.771501  | -0.011383 |
| 9             | 1             | 0           | -0.285091               | 2.764590  | 0.007531  |
| 10            | 1             | 0           | -3.025519               | -0.427639 | 0.007480  |
| 11            | 1             | 0           | 0.048853                | -2.076596 | -0.013640 |
| 12            | 7             | 0           | 2.435326                | -0.855661 | -0.055398 |
| 13            | 1             | 0           | 3.227099                | -0.311097 | 0.216007  |
| 14            | 1             | 0           | 2.489247                | -1.820559 | 0.196794  |

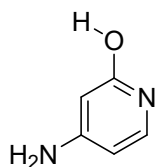

E = -378.7580622 a.u.

| Center Number | Atomic Number | Atomic Type | Coordinates (Angstroms) |           |           |
|---------------|---------------|-------------|-------------------------|-----------|-----------|
|               |               |             | X                       | Y         | Z         |
| 1             | 6             | 0           | 0.000104                | -0.976632 | -0.005440 |
| 2             | 6             | 0           | 1.193178                | -0.267930 | -0.007865 |
| 3             | 6             | 0           | -1.193657               | -0.266189 | 0.001072  |
| 4             | 6             | 0           | 1.117798                | 1.127004  | -0.004297 |
| 5             | 7             | 0           | -1.274800               | 1.043637  | 0.006797  |
| 6             | 8             | 0           | -2.378833               | -0.903393 | 0.003833  |
| 7             | 6             | 0           | -0.127207               | 1.709534  | 0.003680  |
| 8             | 1             | 0           | 2.007398                | 1.731773  | -0.012090 |
| 9             | 1             | 0           | -0.211653               | 2.784630  | 0.008233  |
| 10            | 1             | 0           | -2.247309               | -1.844902 | -0.008181 |
| 11            | 1             | 0           | 0.001630                | -2.054321 | -0.014849 |
| 12            | 7             | 0           | 2.403417                | -0.912556 | -0.057199 |
| 13            | 1             | 0           | 3.211119                | -0.389334 | 0.210114  |
| 14            | 1             | 0           | 2.427864                | -1.872998 | 0.216026  |

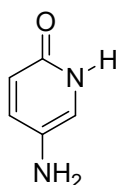

E = -378.7526947 a.u.

| Center Number | Atomic Number | Atomic Type | Coordinates (Angstroms) |           |           |
|---------------|---------------|-------------|-------------------------|-----------|-----------|
|               |               |             | X                       | Y         | Z         |
| 1             | 6             | 0           | -0.728261               | -1.247530 | -0.001404 |
| 2             | 6             | 0           | 0.617257                | -1.211625 | -0.016811 |
| 3             | 6             | 0           | -1.521251               | -0.035217 | 0.003883  |
| 4             | 6             | 0           | 1.340258                | 0.020914  | -0.002232 |
| 5             | 7             | 0           | -0.754916               | 1.110045  | -0.001857 |
| 6             | 8             | 0           | -2.733245               | 0.020502  | 0.007769  |
| 7             | 6             | 0           | 0.613792                | 1.154946  | 0.014163  |
| 8             | 1             | 0           | -1.276311               | 1.965294  | -0.002362 |
| 9             | 1             | 0           | 1.052891                | 2.136053  | 0.026921  |
| 10            | 1             | 0           | -1.272607               | -2.173737 | -0.009128 |
| 11            | 1             | 0           | 1.179395                | -2.131153 | -0.048071 |
| 12            | 7             | 0           | 2.742804                | -0.012444 | -0.080602 |
| 13            | 1             | 0           | 3.171941                | 0.892068  | -0.031415 |
| 14            | 1             | 0           | 3.164655                | -0.624666 | 0.593529  |



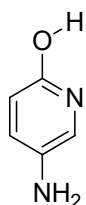

E = -378.7569688 a.u.

| Center Number | Atomic Number | Atomic Type | Coordinates (Angstroms) |           |           |
|---------------|---------------|-------------|-------------------------|-----------|-----------|
|               |               |             | X                       | Y         | Z         |
| 1             | 6             | 0           | 0.699060                | 1.221486  | 0.000006  |
| 2             | 6             | 0           | -0.673961               | 1.203214  | -0.010694 |
| 3             | 6             | 0           | 1.366205                | 0.002029  | 0.002711  |
| 4             | 6             | 0           | -1.356042               | -0.013054 | -0.007785 |
| 5             | 1             | 0           | -1.225424               | 2.128964  | -0.026482 |
| 6             | 7             | 0           | 0.746562                | -1.149355 | 0.000152  |
| 7             | 8             | 0           | 2.712578                | -0.000405 | 0.009545  |
| 8             | 6             | 0           | -0.582631               | -1.158670 | -0.002370 |
| 9             | 1             | 0           | -1.050716               | -2.130995 | -0.004295 |
| 10            | 1             | 0           | 2.996086                | -0.911510 | 0.007445  |
| 11            | 7             | 0           | -2.750594               | -0.065200 | -0.075165 |
| 12            | 1             | 0           | -3.145648               | -0.944274 | 0.196960  |
| 13            | 1             | 0           | -3.218215               | 0.692498  | 0.383120  |
| 14            | 1             | 0           | 1.255729                | 2.140407  | 0.000784  |

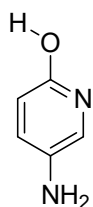

E = -378.7480303 a.u.

| Center Number | Atomic Number | Atomic Type | Coordinates (Angstroms) |           |           |
|---------------|---------------|-------------|-------------------------|-----------|-----------|
|               |               |             | X                       | Y         | Z         |
| 1             | 6             | 0           | 0.726164                | 1.178353  | -0.000273 |
| 2             | 6             | 0           | -0.650569               | 1.203245  | -0.010393 |
| 3             | 6             | 0           | 1.367653                | -0.055381 | 0.002594  |
| 4             | 6             | 0           | -1.361088               | 0.009254  | -0.007981 |
| 5             | 1             | 0           | -1.172709               | 2.145765  | -0.025205 |
| 6             | 7             | 0           | 0.712717                | -1.187616 | 0.000254  |
| 7             | 8             | 0           | 2.714926                | -0.166651 | 0.010220  |
| 8             | 6             | 0           | -0.610042               | -1.156270 | -0.003124 |
| 9             | 1             | 0           | -1.106128               | -2.115429 | -0.005413 |
| 10            | 1             | 0           | 3.115323                | 0.695258  | 0.004352  |
| 11            | 7             | 0           | -2.755573               | -0.016942 | -0.074510 |
| 12            | 1             | 0           | -3.167101               | -0.886310 | 0.204251  |
| 13            | 1             | 0           | -3.210453               | 0.754011  | 0.374153  |
| 14            | 1             | 0           | 1.288949                | 2.096622  | 0.000960  |

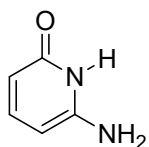

E = -378.7658989 a.u.

| Center Number | Atomic Number | Atomic Type | Coordinates (Angstroms) |           |           |
|---------------|---------------|-------------|-------------------------|-----------|-----------|
|               |               |             | X                       | Y         | Z         |
| 1             | 6             | 0           | 1.363242                | 1.003882  | 0.008623  |
| 2             | 6             | 0           | 0.236585                | 1.755166  | 0.002088  |
| 3             | 6             | 0           | 1.281407                | -0.429800 | 0.003606  |
| 4             | 6             | 0           | -1.058431               | 1.190304  | 0.003356  |
| 5             | 7             | 0           | -0.032230               | -0.917031 | -0.005128 |
| 6             | 8             | 0           | 2.198589                | -1.219981 | -0.000515 |
| 7             | 6             | 0           | -1.161737               | -0.167043 | -0.005868 |
| 8             | 1             | 0           | -0.095135               | -1.915729 | -0.074826 |
| 9             | 1             | 0           | 2.345973                | 1.435480  | 0.010082  |
| 10            | 1             | 0           | 0.322983                | 2.829247  | 0.004040  |
| 11            | 1             | 0           | -1.939570               | 1.803017  | 0.014450  |
| 12            | 7             | 0           | -2.345925               | -0.862005 | -0.068335 |
| 13            | 1             | 0           | -2.374840               | -1.741380 | 0.409931  |
| 14            | 1             | 0           | -3.167428               | -0.312591 | 0.083857  |

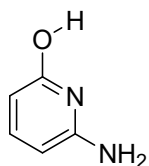

E = -378.7728846 a.u.

| Center Number | Atomic Number | Atomic Type | Coordinates (Angstroms) |           |           |
|---------------|---------------|-------------|-------------------------|-----------|-----------|
|               |               |             | X                       | Y         | Z         |
| 1             | 6             | 0           | 1.253420                | 1.070370  | 0.005065  |
| 2             | 6             | 0           | 0.071021                | 1.783928  | 0.003982  |
| 3             | 6             | 0           | 1.140177                | -0.310386 | 0.000586  |
| 4             | 6             | 0           | -1.144862               | 1.131099  | -0.004229 |
| 5             | 1             | 0           | 0.097220                | 2.860516  | 0.007455  |
| 6             | 7             | 0           | -0.003223               | -0.961740 | -0.001753 |
| 7             | 8             | 0           | 2.256991                | -1.050359 | 0.002960  |
| 8             | 6             | 0           | -1.133300               | -0.262416 | -0.008208 |
| 9             | 1             | 0           | 1.992881                | -1.967576 | -0.007098 |
| 10            | 1             | 0           | 2.219154                | 1.538032  | 0.009530  |
| 11            | 7             | 0           | -2.293209               | -0.990704 | -0.059254 |
| 12            | 1             | 0           | -2.202242               | -1.958470 | 0.173558  |
| 13            | 1             | 0           | -3.132836               | -0.550113 | 0.252922  |
| 14            | 1             | 0           | -2.073815               | 1.672016  | -0.016173 |

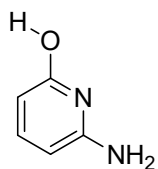

E = -378.7650806 a.u.

| Center Number | Atomic Number | Atomic Type | Coordinates (Angstroms) |           |           |
|---------------|---------------|-------------|-------------------------|-----------|-----------|
|               |               |             | X                       | Y         | Z         |
| 1             | 6             | 0           | -1.250177               | 1.032113  | 0.004003  |
| 2             | 6             | 0           | -0.080375               | 1.770802  | 0.003877  |
| 3             | 6             | 0           | -1.120832               | -0.350801 | 0.000178  |
| 4             | 6             | 0           | 1.141427                | 1.137559  | -0.003684 |
| 5             | 1             | 0           | -0.127379               | 2.846574  | 0.007268  |
| 6             | 7             | 0           | 0.031526                | -0.978516 | -0.002135 |
| 7             | 8             | 0           | -2.193974               | -1.161624 | 0.002597  |
| 8             | 6             | 0           | 1.145094                | -0.259560 | -0.007882 |
| 9             | 1             | 0           | -2.991932               | -0.644343 | 0.004847  |
| 10            | 1             | 0           | -2.216492               | 1.504590  | 0.008355  |
| 11            | 1             | 0           | 2.063140                | 1.690749  | -0.015339 |
| 12            | 7             | 0           | 2.315375                | -0.967848 | -0.057405 |
| 13            | 1             | 0           | 3.150370                | -0.519637 | 0.255524  |
| 14            | 1             | 0           | 2.234955                | -1.941068 | 0.156390  |

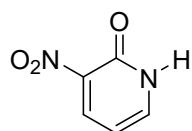

E = -527.8534468 a.u.

| Center Number | Atomic Number | Atomic Type | Coordinates (Angstroms) |           |           |
|---------------|---------------|-------------|-------------------------|-----------|-----------|
|               |               |             | X                       | Y         | Z         |
| 1             | 6             | 0           | 0.423430                | 1.047352  | -0.085500 |
| 2             | 6             | 0           | -0.280665               | -0.221313 | 0.006012  |
| 3             | 6             | 0           | 0.361316                | -1.411454 | 0.067939  |
| 4             | 6             | 0           | 1.768815                | -1.482067 | 0.103410  |
| 5             | 6             | 0           | 2.455568                | -0.318216 | 0.055746  |
| 6             | 7             | 0           | 1.810102                | 0.860348  | -0.031635 |
| 7             | 1             | 0           | -0.232239               | -2.307928 | 0.096331  |
| 8             | 1             | 0           | 2.279839                | -2.421983 | 0.170652  |
| 9             | 1             | 0           | 3.529205                | -0.269202 | 0.082739  |
| 10            | 8             | 0           | -0.024175               | 2.150715  | -0.224317 |
| 11            | 1             | 0           | 2.330607                | 1.716334  | -0.087810 |
| 12            | 7             | 0           | -1.734931               | -0.231175 | 0.025485  |
| 13            | 8             | 0           | -2.294422               | 0.708894  | 0.513299  |
| 14            | 8             | 0           | -2.281950               | -1.210515 | -0.427045 |

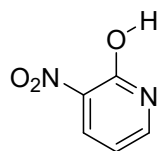

E = -527.8545268 a.u.

| Center Number | Atomic Number | Atomic Type | Coordinates (Angstroms) |           |           |
|---------------|---------------|-------------|-------------------------|-----------|-----------|
|               |               |             | X                       | Y         | Z         |
| 1             | 6             | 0           | -0.492212               | 0.942459  | 0.049649  |
| 2             | 6             | 0           | 0.241216                | -0.247532 | -0.012092 |
| 3             | 6             | 0           | -0.433962               | -1.448682 | -0.064952 |
| 4             | 6             | 0           | -1.813398               | -1.446684 | -0.084462 |
| 5             | 6             | 0           | -2.451187               | -0.222250 | -0.033810 |
| 6             | 7             | 0           | -1.809446               | 0.931691  | 0.039117  |
| 7             | 1             | 0           | 0.135607                | -2.359107 | -0.091791 |
| 8             | 1             | 0           | -2.374158               | -2.360977 | -0.136536 |
| 9             | 1             | 0           | -3.526848               | -0.160750 | -0.048175 |
| 10            | 8             | 0           | 0.101335                | 2.118498  | 0.154662  |
| 11            | 7             | 0           | 1.697189                | -0.278572 | -0.018555 |
| 12            | 8             | 0           | 2.284530                | 0.698787  | -0.390311 |
| 13            | 8             | 0           | 2.218812                | -1.308916 | 0.334973  |
| 14            | 1             | 0           | -0.588953               | 2.778179  | 0.211977  |

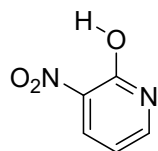

E = -527.8606681 a.u.

| Center Number | Atomic Number | Atomic Type | Coordinates (Angstroms) |           |          |
|---------------|---------------|-------------|-------------------------|-----------|----------|
|               |               |             | X                       | Y         | Z        |
| 1             | 6             | 0           | -0.239541               | -1.052692 | 0.000000 |
| 2             | 6             | 0           | 0.000000                | 0.335441  | 0.000000 |
| 3             | 6             | 0           | 1.301667                | 0.808985  | 0.000000 |
| 4             | 6             | 0           | 2.333307                | -0.095821 | 0.000000 |
| 5             | 6             | 0           | 2.001175                | -1.444543 | 0.000000 |
| 6             | 7             | 0           | 0.768156                | -1.904676 | 0.000000 |
| 7             | 1             | 0           | 1.468417                | 1.870018  | 0.000000 |
| 8             | 1             | 0           | 3.359388                | 0.220843  | 0.000000 |
| 9             | 1             | 0           | 2.777836                | -2.192547 | 0.000000 |
| 10            | 8             | 0           | -1.437798               | -1.591742 | 0.000000 |
| 11            | 7             | 0           | -1.077587               | 1.295908  | 0.000000 |
| 12            | 8             | 0           | -2.220983               | 0.871156  | 0.000000 |
| 13            | 8             | 0           | -0.806361               | 2.463623  | 0.000000 |
| 14            | 1             | 0           | -2.098127               | -0.889460 | 0.000000 |

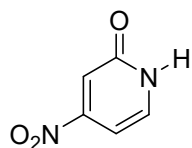

E = -527.8588358 a.u.

| Center Number | Atomic Number | Atomic Type | Coordinates (Angstroms) |           |          |
|---------------|---------------|-------------|-------------------------|-----------|----------|
|               |               |             | X                       | Y         | Z        |
| 1             | 6             | 0           | -0.358789               | -1.840511 | 0.000000 |
| 2             | 6             | 0           | -0.860982               | -0.478514 | 0.000000 |
| 3             | 6             | 0           | 0.000000                | 0.551594  | 0.000000 |
| 4             | 6             | 0           | 1.409780                | 0.403265  | 0.000000 |
| 5             | 6             | 0           | 1.874749                | -0.859695 | 0.000000 |
| 6             | 7             | 0           | 1.027912                | -1.919188 | 0.000000 |
| 7             | 1             | 0           | 2.059931                | 1.252985  | 0.000000 |
| 8             | 1             | 0           | 2.923575                | -1.091867 | 0.000000 |
| 9             | 8             | 0           | -1.036923               | -2.836836 | 0.000000 |
| 10            | 1             | 0           | 1.393817                | -2.852975 | 0.000000 |
| 11            | 1             | 0           | -1.923463               | -0.333110 | 0.000000 |
| 12            | 7             | 0           | -0.546885               | 1.925076  | 0.000000 |
| 13            | 8             | 0           | -1.739798               | 2.052853  | 0.000000 |
| 14            | 8             | 0           | 0.250522                | 2.824847  | 0.000000 |

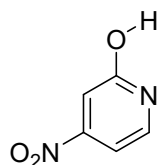

E = -527.860718 a.u.

| Center Number | Atomic Number | Atomic Type | Coordinates (Angstroms) |           |          |
|---------------|---------------|-------------|-------------------------|-----------|----------|
|               |               |             | X                       | Y         | Z        |
| 1             | 6             | 0           | -0.120990               | -1.760106 | 0.000000 |
| 2             | 6             | 0           | -0.791795               | -0.539137 | 0.000000 |
| 3             | 6             | 0           | 0.000000                | 0.577078  | 0.000000 |
| 4             | 6             | 0           | 1.381141                | 0.501163  | 0.000000 |
| 5             | 6             | 0           | 1.919018                | -0.767116 | 0.000000 |
| 6             | 7             | 0           | 1.186257                | -1.874633 | 0.000000 |
| 7             | 1             | 0           | 1.989564                | 1.383531  | 0.000000 |
| 8             | 1             | 0           | 2.986702                | -0.905676 | 0.000000 |
| 9             | 8             | 0           | -0.850958               | -2.876081 | 0.000000 |
| 10            | 1             | 0           | -1.862362               | -0.483392 | 0.000000 |
| 11            | 7             | 0           | -0.645250               | 1.901874  | 0.000000 |
| 12            | 8             | 0           | -1.846015               | 1.933192  | 0.000000 |
| 13            | 8             | 0           | 0.075383                | 2.863426  | 0.000000 |
| 14            | 1             | 0           | -0.252476               | -3.620736 | 0.000000 |

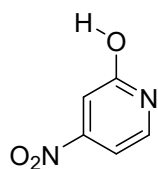

E = -527.8521073 a.u.

| Center Number | Atomic Number | Atomic Type | Coordinates (Angstroms) |           |          |
|---------------|---------------|-------------|-------------------------|-----------|----------|
|               |               |             | X                       | Y         | Z        |
| 1             | 6             | 0           | -0.047395               | -1.774124 | 0.000000 |
| 2             | 6             | 0           | -0.751524               | -0.571903 | 0.000000 |
| 3             | 6             | 0           | 0.000000                | 0.576099  | 0.000000 |
| 4             | 6             | 0           | 1.377559                | 0.545609  | 0.000000 |
| 5             | 6             | 0           | 1.952752                | -0.711323 | 0.000000 |
| 6             | 7             | 0           | 1.263693                | -1.840228 | 0.000000 |
| 7             | 1             | 0           | 1.959557                | 1.445784  | 0.000000 |
| 8             | 1             | 0           | 3.025059                | -0.813202 | 0.000000 |
| 9             | 8             | 0           | -0.675183               | -2.956307 | 0.000000 |
| 10            | 1             | 0           | -1.824417               | -0.525237 | 0.000000 |
| 11            | 7             | 0           | -0.695648               | 1.873971  | 0.000000 |
| 12            | 8             | 0           | -1.897964               | 1.857000  | 0.000000 |
| 13            | 8             | 0           | -0.014995               | 2.863163  | 0.000000 |
| 14            | 1             | 0           | -1.619729               | -2.840551 | 0.000000 |

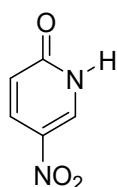

E = -527.864658 a.u.

| Center Number | Atomic Number | Atomic Type | Coordinates (Angstroms) |           |          |
|---------------|---------------|-------------|-------------------------|-----------|----------|
|               |               |             | X                       | Y         | Z        |
| 1             | 6             | 0           | 0.100846                | -2.158095 | 0.000000 |
| 2             | 6             | 0           | 1.304467                | -1.353214 | 0.000000 |
| 3             | 6             | 0           | 1.256358                | -0.008712 | 0.000000 |
| 4             | 6             | 0           | 0.000000                | 0.655197  | 0.000000 |
| 5             | 6             | 0           | -1.145790               | -0.062705 | 0.000000 |
| 6             | 7             | 0           | -1.082199               | -1.400626 | 0.000000 |
| 7             | 1             | 0           | -2.113228               | 0.402857  | 0.000000 |
| 8             | 8             | 0           | 0.037400                | -3.359066 | 0.000000 |
| 9             | 1             | 0           | -1.926895               | -1.942465 | 0.000000 |
| 10            | 1             | 0           | 2.234691                | -1.889576 | 0.000000 |
| 11            | 1             | 0           | 2.151279                | 0.586102  | 0.000000 |
| 12            | 7             | 0           | -0.075199               | 2.093711  | 0.000000 |
| 13            | 8             | 0           | -1.170512               | 2.603093  | 0.000000 |
| 14            | 8             | 0           | 0.965692                | 2.700554  | 0.000000 |

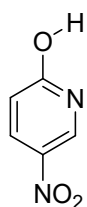

E = -527.86501 a.u.

| Center Number | Atomic Number | Atomic Type | Coordinates (Angstroms) |           |          |
|---------------|---------------|-------------|-------------------------|-----------|----------|
|               |               |             | X                       | Y         | Z        |
| 1             | 6             | 0           | 0.044855                | -2.008411 | 0.000000 |
| 2             | 6             | 0           | 1.267264                | -1.334925 | 0.000000 |
| 3             | 6             | 0           | 1.238061                | 0.033448  | 0.000000 |
| 4             | 6             | 0           | 0.000000                | 0.663074  | 0.000000 |
| 5             | 6             | 0           | -1.155976               | -0.087074 | 0.000000 |
| 6             | 7             | 0           | -1.127799               | -1.409342 | 0.000000 |
| 7             | 1             | 0           | -2.117867               | 0.392566  | 0.000000 |
| 8             | 8             | 0           | 0.057040                | -3.336754 | 0.000000 |
| 9             | 1             | 0           | 2.185910                | -1.890581 | 0.000000 |
| 10            | 1             | 0           | 2.137311                | 0.620742  | 0.000000 |
| 11            | 7             | 0           | -0.079077               | 2.111641  | 0.000000 |
| 12            | 8             | 0           | -1.174693               | 2.612880  | 0.000000 |
| 13            | 8             | 0           | 0.958427                | 2.724790  | 0.000000 |
| 14            | 1             | 0           | -0.848637               | -3.642825 | 0.000000 |

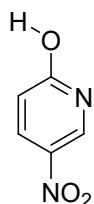

E = -527.8556905 a.u.

| Center Number | Atomic Number | Atomic Type | Coordinates (Angstroms) |           |          |
|---------------|---------------|-------------|-------------------------|-----------|----------|
|               |               |             | X                       | Y         | Z        |
| 1             | 6             | 0           | -0.014084               | -2.012170 | 0.000000 |
| 2             | 6             | 0           | 1.219301                | -1.354598 | 0.000000 |
| 3             | 6             | 0           | 1.222139                | 0.016398  | 0.000000 |
| 4             | 6             | 0           | 0.000000                | 0.666774  | 0.000000 |
| 5             | 6             | 0           | -1.169662               | -0.068150 | 0.000000 |
| 6             | 7             | 0           | -1.171534               | -1.386889 | 0.000000 |
| 7             | 1             | 0           | -2.122423               | 0.430318  | 0.000000 |
| 8             | 8             | 0           | -0.099761               | -3.342996 | 0.000000 |
| 9             | 1             | 0           | 2.141668                | -1.908756 | 0.000000 |
| 10            | 1             | 0           | 2.134496                | 0.583130  | 0.000000 |
| 11            | 7             | 0           | -0.051319               | 2.116524  | 0.000000 |
| 12            | 8             | 0           | -1.136667               | 2.638315  | 0.000000 |
| 13            | 8             | 0           | 0.998321                | 2.709575  | 0.000000 |
| 14            | 1             | 0           | 0.764928                | -3.740822 | 0.000000 |

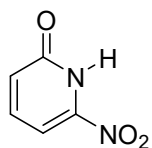

E = -527.8580828 a.u.

| Center Number | Atomic Number | Atomic Type | Coordinates (Angstroms) |           |          |
|---------------|---------------|-------------|-------------------------|-----------|----------|
|               |               |             | X                       | Y         | Z        |
| 1             | 6             | 0           | 0.018356                | -1.852895 | 0.000000 |
| 2             | 6             | 0           | 1.467701                | -1.731184 | 0.000000 |
| 3             | 6             | 0           | 2.081578                | -0.533142 | 0.000000 |
| 4             | 6             | 0           | 1.334982                | 0.682102  | 0.000000 |
| 5             | 6             | 0           | 0.000000                | 0.563796  | 0.000000 |
| 6             | 7             | 0           | -0.637967               | -0.626479 | 0.000000 |
| 7             | 8             | 0           | -0.601622               | -2.884688 | 0.000000 |
| 8             | 1             | 0           | -1.643497               | -0.635393 | 0.000000 |
| 9             | 1             | 0           | 2.016233                | -2.654865 | 0.000000 |
| 10            | 1             | 0           | 3.156381                | -0.478794 | 0.000000 |
| 11            | 1             | 0           | 1.795368                | 1.649335  | 0.000000 |
| 12            | 7             | 0           | -0.874638               | 1.733449  | 0.000000 |
| 13            | 8             | 0           | -2.060667               | 1.519380  | 0.000000 |
| 14            | 8             | 0           | -0.356704               | 2.815167  | 0.000000 |

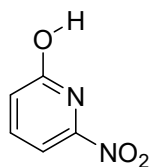

E = -527.8622989 a.u.

| Center Number | Atomic Number | Atomic Type | Coordinates (Angstroms) |           |          |
|---------------|---------------|-------------|-------------------------|-----------|----------|
|               |               |             | X                       | Y         | Z        |
| 1             | 6             | 0           | -0.035641               | -1.704774 | 0.000000 |
| 2             | 6             | 0           | 1.358064                | -1.772360 | 0.000000 |
| 3             | 6             | 0           | 2.053859                | -0.589527 | 0.000000 |
| 4             | 6             | 0           | 1.366925                | 0.621758  | 0.000000 |
| 5             | 6             | 0           | 0.000000                | 0.533988  | 0.000000 |
| 6             | 7             | 0           | -0.698615               | -0.574954 | 0.000000 |
| 7             | 8             | 0           | -0.730582               | -2.841935 | 0.000000 |
| 8             | 1             | 0           | 1.845704                | -2.729278 | 0.000000 |
| 9             | 1             | 0           | 3.129653                | -0.595744 | 0.000000 |
| 10            | 1             | 0           | 1.860898                | 1.572418  | 0.000000 |
| 11            | 7             | 0           | -0.798630               | 1.786882  | 0.000000 |
| 12            | 8             | 0           | -1.989793               | 1.693729  | 0.000000 |
| 13            | 8             | 0           | -0.173785               | 2.818291  | 0.000000 |
| 14            | 1             | 0           | -1.661498               | -2.626083 | 0.000000 |



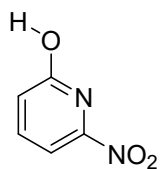

E = -527.8526698 a.u.

| Center Number | Atomic Number | Atomic Type | Coordinates (Angstroms) |           |          |
|---------------|---------------|-------------|-------------------------|-----------|----------|
|               |               |             | X                       | Y         | Z        |
| 1             | 6             | 0           | -0.091402               | -1.697106 | 0.000000 |
| 2             | 6             | 0           | 1.301386                | -1.787802 | 0.000000 |
| 3             | 6             | 0           | 2.029475                | -0.620732 | 0.000000 |
| 4             | 6             | 0           | 1.371996                | 0.601053  | 0.000000 |
| 5             | 6             | 0           | 0.000000                | 0.536155  | 0.000000 |
| 6             | 7             | 0           | -0.723641               | -0.549271 | 0.000000 |
| 7             | 8             | 0           | -0.879428               | -2.777808 | 0.000000 |
| 8             | 1             | 0           | 1.790347                | -2.746667 | 0.000000 |
| 9             | 1             | 0           | 3.104726                | -0.655595 | 0.000000 |
| 10            | 1             | 0           | 1.884559                | 1.541635  | 0.000000 |
| 11            | 7             | 0           | -0.769140               | 1.812617  | 0.000000 |
| 12            | 8             | 0           | -1.960557               | 1.751716  | 0.000000 |
| 13            | 8             | 0           | -0.114654               | 2.826576  | 0.000000 |
| 14            | 1             | 0           | -0.361777               | -3.576065 | 0.000000 |

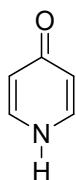

E = -323.4025585 a.u.

| Center Number | Atomic Number | Atomic Type | Coordinates (Angstroms) |           |           |
|---------------|---------------|-------------|-------------------------|-----------|-----------|
|               |               |             | X                       | Y         | Z         |
| 1             | 6             | 0           | 0.000000                | -1.182230 | -1.036416 |
| 2             | 6             | 0           | 0.000000                | -1.221558 | 0.304982  |
| 3             | 6             | 0           | 0.000000                | 0.000000  | 1.100689  |
| 4             | 6             | 0           | 0.000000                | 1.221558  | 0.304982  |
| 5             | 6             | 0           | 0.000000                | 1.182230  | -1.036416 |
| 6             | 7             | 0           | 0.000000                | 0.000000  | -1.713728 |
| 7             | 1             | 0           | 0.000000                | -2.068715 | -1.645018 |
| 8             | 1             | 0           | 0.000000                | -2.164125 | 0.820840  |
| 9             | 1             | 0           | 0.000000                | 2.164125  | 0.820840  |
| 10            | 1             | 0           | 0.000000                | 2.068715  | -1.645018 |
| 11            | 8             | 0           | 0.000000                | 0.000000  | 2.316101  |
| 12            | 1             | 0           | 0.000000                | 0.000000  | -2.711294 |

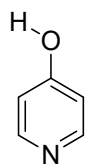

E = -323.4066016 a.u.

| Center Number | Atomic Number | Atomic Type | Coordinates (Angstroms) |           |          |
|---------------|---------------|-------------|-------------------------|-----------|----------|
|               |               |             | X                       | Y         | Z        |
| 1             | 6             | 0           | 1.144806                | -1.150834 | 0.000000 |
| 2             | 6             | 0           | 1.196601                | 0.228070  | 0.000000 |
| 3             | 6             | 0           | 0.000000                | 0.925139  | 0.000000 |
| 4             | 6             | 0           | -1.184625               | 0.207194  | 0.000000 |
| 5             | 6             | 0           | -1.111119               | -1.173870 | 0.000000 |
| 6             | 7             | 0           | 0.021621                | -1.856393 | 0.000000 |
| 7             | 1             | 0           | 2.061935                | -1.717773 | 0.000000 |
| 8             | 1             | 0           | 2.132412                | 0.756738  | 0.000000 |
| 9             | 1             | 0           | -2.140842               | 0.703731  | 0.000000 |
| 10            | 1             | 0           | -2.019642               | -1.754825 | 0.000000 |
| 11            | 8             | 0           | 0.046509                | 2.269477  | 0.000000 |
| 12            | 1             | 0           | -0.831267               | 2.636879  | 0.000000 |

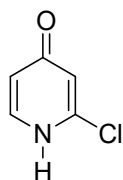

E = -783.0094105 a.u.

| Center Number | Atomic Number | Atomic Type | Coordinates (Angstroms) |           |          |
|---------------|---------------|-------------|-------------------------|-----------|----------|
|               |               |             | X                       | Y         | Z        |
| 1             | 6             | 0           | 1.658991                | 0.918031  | 0.000000 |
| 2             | 6             | 0           | 0.734947                | 1.887193  | 0.000000 |
| 3             | 6             | 0           | -0.689540               | 1.573319  | 0.000000 |
| 4             | 6             | 0           | -0.988670               | 0.143839  | 0.000000 |
| 5             | 6             | 0           | 0.000000                | -0.758225 | 0.000000 |
| 6             | 7             | 0           | 1.312140                | -0.403698 | 0.000000 |
| 7             | 1             | 0           | 2.715694                | 1.114153  | 0.000000 |
| 8             | 1             | 0           | 1.028135                | 2.920471  | 0.000000 |
| 9             | 1             | 0           | -2.015857               | -0.166756 | 0.000000 |
| 10            | 8             | 0           | -1.556870               | 2.421151  | 0.000000 |
| 11            | 1             | 0           | 2.013138                | -1.114847 | 0.000000 |
| 12            | 17            | 0           | -0.280323               | -2.463605 | 0.000000 |

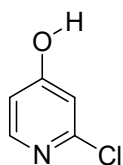

E = -783.0186604 a.u.

| Center Number | Atomic Number | Atomic Type | Coordinates (Angstroms) |           |          |
|---------------|---------------|-------------|-------------------------|-----------|----------|
|               |               |             | X                       | Y         | Z        |
| 1             | 6             | 0           | 1.821827                | -0.502021 | 0.000000 |
| 2             | 6             | 0           | 1.075474                | -1.656939 | 0.000000 |
| 3             | 6             | 0           | -0.307790               | -1.535523 | 0.000000 |
| 4             | 6             | 0           | -0.869779               | -0.271309 | 0.000000 |
| 5             | 6             | 0           | 0.000000                | 0.805287  | 0.000000 |
| 6             | 7             | 0           | 1.301287                | 0.722244  | 0.000000 |
| 7             | 1             | 0           | 2.897841                | -0.554472 | 0.000000 |
| 8             | 1             | 0           | 1.535241                | -2.627871 | 0.000000 |
| 9             | 1             | 0           | -1.934581               | -0.121387 | 0.000000 |
| 10            | 8             | 0           | -1.040731               | -2.658853 | 0.000000 |
| 11            | 1             | 0           | -1.971773               | -2.460510 | 0.000000 |
| 12            | 17            | 0           | -0.684016               | 2.408375  | 0.000000 |

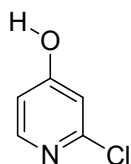

E = -783.0183691 a.u.

| Center Number | Atomic Number | Atomic Type | Coordinates (Angstroms) |           |          |
|---------------|---------------|-------------|-------------------------|-----------|----------|
|               |               |             | X                       | Y         | Z        |
| 1             | 6             | 0           | 1.806785                | -0.519528 | 0.000000 |
| 2             | 6             | 0           | 1.040316                | -1.665435 | 0.000000 |
| 3             | 6             | 0           | -0.340667               | -1.523290 | 0.000000 |
| 4             | 6             | 0           | -0.884351               | -0.251354 | 0.000000 |
| 5             | 6             | 0           | 0.000000                | 0.808732  | 0.000000 |
| 6             | 7             | 0           | 1.304901                | 0.707435  | 0.000000 |
| 7             | 1             | 0           | 2.881953                | -0.589945 | 0.000000 |
| 8             | 1             | 0           | 1.505338                | -2.636502 | 0.000000 |
| 9             | 1             | 0           | -1.947614               | -0.106885 | 0.000000 |
| 10            | 8             | 0           | -1.186786               | -2.564764 | 0.000000 |
| 11            | 1             | 0           | -0.711409               | -3.389221 | 0.000000 |
| 12            | 17            | 0           | -0.652988               | 2.423168  | 0.000000 |

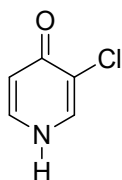

E = -783.0078366 a.u.

| Center Number | Atomic Number | Atomic Type | Coordinates (Angstroms) |           |          |
|---------------|---------------|-------------|-------------------------|-----------|----------|
|               |               |             | X                       | Y         | Z        |
| 1             | 6             | 0           | 1.225001                | 1.913399  | 0.000000 |
| 2             | 6             | 0           | -0.116557               | 1.884818  | 0.000000 |
| 3             | 6             | 0           | -0.865980               | 0.636542  | 0.000000 |
| 4             | 6             | 0           | 0.000000                | -0.546748 | 0.000000 |
| 5             | 6             | 0           | 1.339683                | -0.447778 | 0.000000 |
| 6             | 7             | 0           | 1.954675                | 0.765378  | 0.000000 |
| 7             | 1             | 0           | 1.789334                | 2.828170  | 0.000000 |
| 8             | 1             | 0           | -0.680304               | 2.799295  | 0.000000 |
| 9             | 1             | 0           | 1.978745                | -1.310979 | 0.000000 |
| 10            | 8             | 0           | -2.074207               | 0.582812  | 0.000000 |
| 11            | 1             | 0           | 2.951750                | 0.807665  | 0.000000 |
| 12            | 17            | 0           | -0.742440               | -2.105041 | 0.000000 |

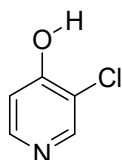

E = -783.0160954 a.u.

| Center Number | Atomic Number | Atomic Type | Coordinates (Angstroms) |           |          |
|---------------|---------------|-------------|-------------------------|-----------|----------|
|               |               |             | X                       | Y         | Z        |
| 1             | 6             | 0           | 1.588066                | -1.650242 | 0.000000 |
| 2             | 6             | 0           | 0.223877                | -1.846064 | 0.000000 |
| 3             | 6             | 0           | -0.607471               | -0.737165 | 0.000000 |
| 4             | 6             | 0           | 0.000000                | 0.510850  | 0.000000 |
| 5             | 6             | 0           | 1.378494                | 0.600009  | 0.000000 |
| 6             | 7             | 0           | 2.167802                | -0.456858 | 0.000000 |
| 7             | 1             | 0           | 2.250147                | -2.500456 | 0.000000 |
| 8             | 1             | 0           | -0.205895               | -2.831270 | 0.000000 |
| 9             | 8             | 0           | -1.930210               | -0.914861 | 0.000000 |
| 10            | 1             | 0           | -2.380266               | -0.072697 | 0.000000 |
| 11            | 1             | 0           | 1.847168                | 1.570250  | 0.000000 |
| 12            | 17            | 0           | -0.984817               | 1.946278  | 0.000000 |

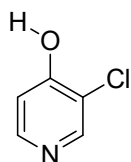

E = -783.0115104 a.u.

| Center Number | Atomic Number | Atomic Type | Coordinates (Angstroms) |           |          |
|---------------|---------------|-------------|-------------------------|-----------|----------|
|               |               |             | X                       | Y         | Z        |
| 1             | 6             | 0           | 1.548106                | -1.678482 | 0.000000 |
| 2             | 6             | 0           | 0.176582                | -1.837513 | 0.000000 |
| 3             | 6             | 0           | -0.629325               | -0.709507 | 0.000000 |
| 4             | 6             | 0           | 0.000000                | 0.527772  | 0.000000 |
| 5             | 6             | 0           | 1.381125                | 0.573927  | 0.000000 |
| 6             | 7             | 0           | 2.150474                | -0.500836 | 0.000000 |
| 7             | 1             | 0           | 2.188416                | -2.545490 | 0.000000 |
| 8             | 1             | 0           | -0.260306               | -2.822246 | 0.000000 |
| 9             | 8             | 0           | -1.966030               | -0.757769 | 0.000000 |
| 10            | 1             | 0           | -2.268907               | -1.659904 | 0.000000 |
| 11            | 1             | 0           | 1.873562                | 1.532150  | 0.000000 |
| 12            | 17            | 0           | -0.924516               | 1.988607  | 0.000000 |

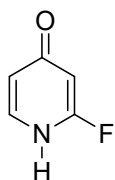

E = -422.6359716 a.u.

| Center Number | Atomic Number | Atomic Type | Coordinates (Angstroms) |           |          |
|---------------|---------------|-------------|-------------------------|-----------|----------|
|               |               |             | X                       | Y         | Z        |
| 1             | 6             | 0           | -0.110031               | -1.686564 | 0.000000 |
| 2             | 6             | 0           | -1.269772               | -1.019734 | 0.000000 |
| 3             | 6             | 0           | -1.310861               | 0.442840  | 0.000000 |
| 4             | 6             | 0           | 0.000000                | 1.080175  | 0.000000 |
| 5             | 6             | 0           | 1.100343                | 0.325988  | 0.000000 |
| 6             | 7             | 0           | 1.089948                | -1.025530 | 0.000000 |
| 7             | 1             | 0           | -0.045049               | -2.758836 | 0.000000 |
| 8             | 1             | 0           | -2.203326               | -1.550784 | 0.000000 |
| 9             | 1             | 0           | 0.073995                | 2.150879  | 0.000000 |
| 10            | 8             | 0           | -2.348211               | 1.070763  | 0.000000 |
| 11            | 1             | 0           | 1.959660                | -1.517717 | 0.000000 |
| 12            | 9             | 0           | 2.323633                | 0.825870  | 0.000000 |

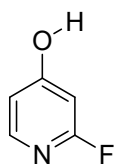

E = -422.6489721 a.u.

| Center Number | Atomic Number | Atomic Type | Coordinates (Angstroms) |           |          |
|---------------|---------------|-------------|-------------------------|-----------|----------|
|               |               |             | X                       | Y         | Z        |
| 1             | 6             | 0           | -0.100733               | -1.702239 | 0.000000 |
| 2             | 6             | 0           | 1.135518                | -1.102834 | 0.000000 |
| 3             | 6             | 0           | 1.184432                | 0.287412  | 0.000000 |
| 4             | 6             | 0           | 0.000000                | 0.999832  | 0.000000 |
| 5             | 6             | 0           | -1.165334               | 0.258132  | 0.000000 |
| 6             | 7             | 0           | -1.253590               | -1.034491 | 0.000000 |
| 7             | 1             | 0           | -0.179381               | -2.776540 | 0.000000 |
| 8             | 1             | 0           | 2.043182                | -1.677122 | 0.000000 |
| 9             | 1             | 0           | -0.035012               | 2.074803  | 0.000000 |
| 10            | 8             | 0           | 2.389223                | 0.875269  | 0.000000 |
| 11            | 1             | 0           | 2.307727                | 1.823638  | 0.000000 |
| 12            | 9             | 0           | -2.310940               | 0.928077  | 0.000000 |

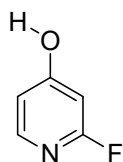

E = -422.6488057 a.u.

| Center Number | Atomic Number | Atomic Type | Coordinates (Angstroms) |           |          |
|---------------|---------------|-------------|-------------------------|-----------|----------|
|               |               |             | X                       | Y         | Z        |
| 1             | 6             | 0           | -0.119619               | -1.692103 | 0.000000 |
| 2             | 6             | 0           | 1.122646                | -1.097243 | 0.000000 |
| 3             | 6             | 0           | 1.179338                | 0.292698  | 0.000000 |
| 4             | 6             | 0           | 0.000000                | 1.012211  | 0.000000 |
| 5             | 6             | 0           | -1.166032               | 0.278132  | 0.000000 |
| 6             | 7             | 0           | -1.263604               | -1.018542 | 0.000000 |
| 7             | 1             | 0           | -0.202714               | -2.766265 | 0.000000 |
| 8             | 1             | 0           | 2.017644                | -1.695410 | 0.000000 |
| 9             | 1             | 0           | -0.007262               | 2.085509  | 0.000000 |
| 10            | 8             | 0           | 2.332097                | 0.978319  | 0.000000 |
| 11            | 1             | 0           | 3.078360                | 0.387827  | 0.000000 |
| 12            | 9             | 0           | -2.310621               | 0.947712  | 0.000000 |

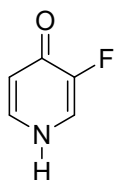

E = -422.6276961 a.u.

| Center Number | Atomic Number | Atomic Type | Coordinates (Angstroms) |           |          |
|---------------|---------------|-------------|-------------------------|-----------|----------|
|               |               |             | X                       | Y         | Z        |
| 1             | 6             | 0           | -0.864716               | -1.701940 | 0.000000 |
| 2             | 6             | 0           | 0.462586                | -1.486580 | 0.000000 |
| 3             | 6             | 0           | 1.028128                | -0.147689 | 0.000000 |
| 4             | 6             | 0           | 0.000000                | 0.887611  | 0.000000 |
| 5             | 6             | 0           | -1.311597               | 0.618555  | 0.000000 |
| 6             | 7             | 0           | -1.750166               | -0.672940 | 0.000000 |
| 7             | 1             | 0           | -1.292690               | -2.687912 | 0.000000 |
| 8             | 1             | 0           | 1.146477                | -2.315021 | 0.000000 |
| 9             | 1             | 0           | -2.051964               | 1.396619  | 0.000000 |
| 10            | 8             | 0           | 2.214120                | 0.097407  | 0.000000 |
| 11            | 1             | 0           | -2.730691               | -0.856852 | 0.000000 |
| 12            | 9             | 0           | 0.397852                | 2.152749  | 0.000000 |

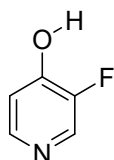

E = -422.6364508 a.u.

| Center Number | Atomic Number | Atomic Type | Coordinates (Angstroms) |           |          |
|---------------|---------------|-------------|-------------------------|-----------|----------|
|               |               |             | X                       | Y         | Z        |
| 1             | 6             | 0           | -1.139806               | -1.576076 | 0.000000 |
| 2             | 6             | 0           | 0.240641                | -1.510940 | 0.000000 |
| 3             | 6             | 0           | 0.841012                | -0.265120 | 0.000000 |
| 4             | 6             | 0           | 0.000000                | 0.831705  | 0.000000 |
| 5             | 6             | 0           | -1.363313               | 0.675965  | 0.000000 |
| 6             | 7             | 0           | -1.935518               | -0.516675 | 0.000000 |
| 7             | 1             | 0           | -1.627655               | -2.536811 | 0.000000 |
| 8             | 1             | 0           | 0.848310                | -2.397662 | 0.000000 |
| 9             | 8             | 0           | 2.174198                | -0.146680 | 0.000000 |
| 10            | 1             | 0           | 2.424074                | 0.773889  | 0.000000 |
| 11            | 1             | 0           | -1.998541               | 1.546656  | 0.000000 |
| 12            | 9             | 0           | 0.559740                | 2.052321  | 0.000000 |

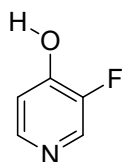

E = -422.6320997 a.u.

| Center Number | Atomic Number | Atomic Type | Coordinates (Angstroms) |           |          |
|---------------|---------------|-------------|-------------------------|-----------|----------|
|               |               |             | X                       | Y         | Z        |
| 1             | 6             | 0           | -1.128566               | 1.573659  | 0.000000 |
| 2             | 6             | 0           | 0.252250                | 1.489602  | 0.000000 |
| 3             | 6             | 0           | 0.847868                | 0.239848  | 0.000000 |
| 4             | 6             | 0           | 0.000000                | -0.855277 | 0.000000 |
| 5             | 6             | 0           | -1.361542               | -0.673944 | 0.000000 |
| 6             | 7             | 0           | -1.929364               | 0.522527  | 0.000000 |
| 7             | 1             | 0           | -1.604524               | 2.540443  | 0.000000 |
| 8             | 1             | 0           | 0.854874                | 2.382663  | 0.000000 |
| 9             | 8             | 0           | 2.169880                | 0.026057  | 0.000000 |
| 10            | 1             | 0           | 2.643813                | 0.851335  | 0.000000 |
| 11            | 1             | 0           | -2.003961               | -1.539346 | 0.000000 |
| 12            | 9             | 0           | 0.510695                | -2.082730 | 0.000000 |

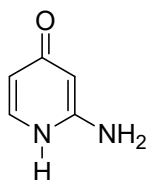

E = -378.7495345 a.u.

| Center Number | Atomic Number | Atomic Type | Coordinates (Angstroms) |           |           |
|---------------|---------------|-------------|-------------------------|-----------|-----------|
|               |               |             | X                       | Y         | Z         |
| 1             | 6             | 0           | 0.171288                | 1.696465  | 0.002038  |
| 2             | 6             | 0           | 1.320765                | 1.014945  | 0.008509  |
| 3             | 6             | 0           | 1.327400                | -0.447580 | -0.001417 |
| 4             | 6             | 0           | 0.010239                | -1.050899 | 0.007983  |
| 5             | 6             | 0           | -1.114963               | -0.304280 | -0.003995 |
| 6             | 7             | 0           | -1.041460               | 1.058968  | 0.004489  |
| 7             | 1             | 0           | 0.124320                | 2.770424  | -0.001445 |
| 8             | 1             | 0           | 2.264063                | 1.528601  | 0.018097  |
| 9             | 1             | 0           | -0.052858               | -2.123773 | 0.036177  |
| 10            | 8             | 0           | 2.357541                | -1.095274 | -0.000384 |
| 11            | 1             | 0           | -1.871970               | 1.582480  | -0.179827 |
| 12            | 7             | 0           | -2.404278               | -0.807027 | -0.073279 |
| 13            | 1             | 0           | -2.443585               | -1.807188 | -0.049182 |
| 14            | 1             | 0           | -3.048510               | -0.403839 | 0.582073  |



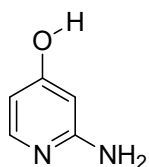

E = -378.760986 a.u.

| Center Number | Atomic Number | Atomic Type | Coordinates (Angstroms) |           |           |
|---------------|---------------|-------------|-------------------------|-----------|-----------|
|               |               |             | X                       | Y         | Z         |
| 1             | 6             | 0           | -0.044222               | 1.708666  | 0.002394  |
| 2             | 6             | 0           | 1.188275                | 1.099494  | 0.006367  |
| 3             | 6             | 0           | 1.207973                | -0.290654 | 0.001751  |
| 4             | 6             | 0           | 0.018918                | -0.986728 | -0.008301 |
| 5             | 6             | 0           | -1.172697               | -0.256924 | -0.008521 |
| 6             | 7             | 0           | -1.205654               | 1.066537  | -0.000523 |
| 7             | 1             | 0           | -0.107059               | 2.785158  | 0.006330  |
| 8             | 1             | 0           | 2.103562                | 1.660734  | 0.012739  |
| 9             | 1             | 0           | 0.003218                | -2.064078 | -0.028311 |
| 10            | 8             | 0           | 2.406763                | -0.901726 | 0.003945  |
| 11            | 1             | 0           | 2.301172                | -1.847251 | -0.008468 |
| 12            | 7             | 0           | -2.385439               | -0.897539 | -0.059989 |
| 13            | 1             | 0           | -2.436799               | -1.830656 | 0.291617  |
| 14            | 1             | 0           | -3.170038               | -0.316195 | 0.155983  |

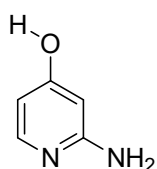

E = -378.761394 a.u.

| Center Number | Atomic Number | Atomic Type | Coordinates (Angstroms) |           |           |
|---------------|---------------|-------------|-------------------------|-----------|-----------|
|               |               |             | X                       | Y         | Z         |
| 1             | 6             | 0           | -0.025095               | 1.700226  | 0.002546  |
| 2             | 6             | 0           | 1.198468                | 1.066900  | 0.004841  |
| 3             | 6             | 0           | 1.194168                | -0.324871 | 0.000950  |
| 4             | 6             | 0           | -0.004638               | -0.999755 | -0.007900 |
| 5             | 6             | 0           | -1.180335               | -0.249615 | -0.008413 |
| 6             | 7             | 0           | -1.192943               | 1.078570  | 0.000040  |
| 7             | 1             | 0           | -0.067268               | 2.777944  | 0.007355  |
| 8             | 1             | 0           | 2.115413                | 1.630424  | 0.010941  |
| 9             | 1             | 0           | -0.019138               | -2.074587 | -0.023960 |
| 10            | 8             | 0           | 2.326854                | -1.052472 | 0.003372  |
| 11            | 1             | 0           | 3.087672                | -0.481451 | 0.003689  |
| 12            | 7             | 0           | -2.403744               | -0.865177 | -0.057820 |
| 13            | 1             | 0           | -2.469360               | -1.807573 | 0.264719  |
| 14            | 1             | 0           | -3.180751               | -0.276045 | 0.162597  |

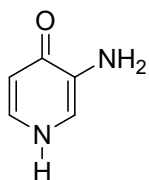

E = -378.74788 a.u.

| Center Number | Atomic Number | Atomic Type | Coordinates (Angstroms) |           |           |
|---------------|---------------|-------------|-------------------------|-----------|-----------|
|               |               |             | X                       | Y         | Z         |
| 1             | 6             | 0           | -1.873984               | 0.519995  | 0.005066  |
| 2             | 6             | 0           | -0.808877               | 1.351047  | -0.003426 |
| 3             | 6             | 0           | 0.535423                | 0.842025  | -0.004307 |
| 4             | 6             | 0           | 0.646809                | -0.623367 | -0.012473 |
| 5             | 6             | 0           | -0.466115               | -1.386417 | -0.007073 |
| 6             | 7             | 0           | -1.714970               | -0.817454 | 0.008591  |
| 7             | 1             | 0           | -2.888190               | 0.876281  | 0.012839  |
| 8             | 1             | 0           | -0.949297               | 2.415861  | 0.002118  |
| 9             | 1             | 0           | -0.438957               | -2.460650 | -0.022028 |
| 10            | 8             | 0           | 1.543299                | 1.532951  | 0.011563  |
| 11            | 1             | 0           | -2.516403               | -1.411213 | 0.011324  |
| 12            | 7             | 0           | 1.931992                | -1.113428 | -0.073246 |
| 13            | 1             | 0           | 2.115086                | -1.987891 | 0.374263  |
| 14            | 1             | 0           | 2.612683                | -0.399518 | 0.114849  |

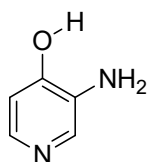

E = -378.750103 a.u.

| Center Number | Atomic Number | Atomic Type | Coordinates (Angstroms) |           |           |
|---------------|---------------|-------------|-------------------------|-----------|-----------|
|               |               |             | X                       | Y         | Z         |
| 1             | 6             | 0           | 1.131982                | -1.623921 | 0.000000  |
| 2             | 6             | 0           | -0.245661               | -1.548173 | 0.000000  |
| 3             | 6             | 0           | -0.826878               | -0.291261 | 0.000000  |
| 4             | 6             | 0           | 0.000000                | 0.829290  | 0.000000  |
| 5             | 6             | 0           | 1.367043                | 0.622783  | 0.000000  |
| 6             | 7             | 0           | 1.938212                | -0.570102 | 0.000000  |
| 7             | 1             | 0           | 1.613332                | -2.588645 | 0.000000  |
| 8             | 1             | 0           | -0.859340               | -2.430639 | 0.000000  |
| 9             | 8             | 0           | -2.153225               | -0.151496 | 0.000000  |
| 10            | 1             | 0           | -2.330062               | 0.792997  | 0.000000  |
| 11            | 1             | 0           | 2.029067                | 1.476481  | 0.000000  |
| 12            | 7             | 0           | -0.643391               | 2.103346  | 0.000000  |
| 13            | 1             | 0           | -0.424928               | 2.648378  | 0.815652  |
| 14            | 1             | 0           | -0.424928               | 2.648378  | -0.815652 |

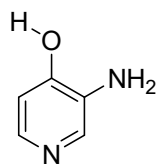

E = -378.7482322 a.u.

| Center Number | Atomic Number | Atomic Type | Coordinates (Angstroms) |           |           |
|---------------|---------------|-------------|-------------------------|-----------|-----------|
|               |               |             | X                       | Y         | Z         |
| 1             | 6             | 0           | -1.911609               | 0.505797  | 0.005798  |
| 2             | 6             | 0           | -0.788819               | 1.317128  | 0.001773  |
| 3             | 6             | 0           | 0.455361                | 0.724742  | -0.005043 |
| 4             | 6             | 0           | 0.550376                | -0.664847 | -0.009739 |
| 5             | 6             | 0           | -0.644084               | -1.369846 | -0.004050 |
| 6             | 7             | 0           | -1.844523               | -0.812357 | 0.005493  |
| 7             | 1             | 0           | -2.895936               | 0.943798  | 0.010976  |
| 8             | 1             | 0           | -0.888254               | 2.390229  | 0.006501  |
| 9             | 8             | 0           | 1.622517                | 1.411211  | 0.001085  |
| 10            | 1             | 0           | 1.463431                | 2.348723  | 0.016505  |
| 11            | 1             | 0           | -0.614158               | -2.449243 | -0.009940 |
| 12            | 7             | 0           | 1.787850                | -1.284133 | -0.073854 |
| 13            | 1             | 0           | 1.825175                | -2.211077 | 0.299946  |
| 14            | 1             | 0           | 2.558960                | -0.714524 | 0.213425  |

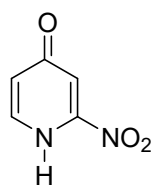

E = -527.8433477 a.u.

| Center Number | Atomic Number | Atomic Type | Coordinates (Angstroms) |           |          |
|---------------|---------------|-------------|-------------------------|-----------|----------|
|               |               |             | X                       | Y         | Z        |
| 1             | 6             | 0           | 1.759181                | -1.035241 | 0.000000 |
| 2             | 6             | 0           | 0.898500                | -2.066230 | 0.000000 |
| 3             | 6             | 0           | -0.542299               | -1.856310 | 0.000000 |
| 4             | 6             | 0           | -0.939660               | -0.444239 | 0.000000 |
| 5             | 6             | 0           | 0.000000                | 0.505145  | 0.000000 |
| 6             | 7             | 0           | 1.329970                | 0.256133  | 0.000000 |
| 7             | 1             | 0           | 2.825737                | -1.165404 | 0.000000 |
| 8             | 1             | 0           | 1.262398                | -3.076622 | 0.000000 |
| 9             | 1             | 0           | -1.980726               | -0.185253 | 0.000000 |
| 10            | 8             | 0           | -1.355421               | -2.752906 | 0.000000 |
| 11            | 1             | 0           | 1.959672                | 1.035126  | 0.000000 |
| 12            | 8             | 0           | 0.592575                | 2.701316  | 0.000000 |
| 13            | 8             | 0           | -1.494977               | 2.233382  | 0.000000 |
| 14            | 7             | 0           | -0.338374               | 1.932306  | 0.000000 |

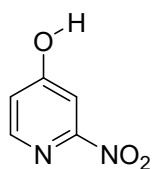

E = -527.8505467 a.u.

| Center Number | Atomic Number | Atomic Type | Coordinates (Angstroms) |           |          |
|---------------|---------------|-------------|-------------------------|-----------|----------|
|               |               |             | X                       | Y         | Z        |
| 1             | 6             | 0           | 0.946077                | 1.800407  | 0.000000 |
| 2             | 6             | 0           | 2.004579                | 0.917354  | 0.000000 |
| 3             | 6             | 0           | 1.729143                | -0.442307 | 0.000000 |
| 4             | 6             | 0           | 0.406977                | -0.856206 | 0.000000 |
| 5             | 6             | 0           | -0.543937               | 0.140709  | 0.000000 |
| 6             | 7             | 0           | -0.325534               | 1.422216  | 0.000000 |
| 7             | 1             | 0           | 1.125450                | 2.862175  | 0.000000 |
| 8             | 1             | 0           | 3.022726                | 1.260940  | 0.000000 |
| 9             | 1             | 0           | 0.118581                | -1.890503 | 0.000000 |
| 10            | 8             | 0           | 2.760837                | -1.295723 | 0.000000 |
| 11            | 8             | 0           | -2.808663               | 0.579720  | 0.000000 |
| 12            | 8             | 0           | -2.186502               | -1.462889 | 0.000000 |
| 13            | 7             | 0           | -1.975995               | -0.273848 | 0.000000 |
| 14            | 1             | 0           | 2.461535                | -2.199788 | 0.000000 |

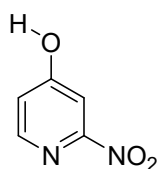

E = -527.8496738 a.u.

| Center Number | Atomic Number | Atomic Type | Coordinates (Angstroms) |           |           |
|---------------|---------------|-------------|-------------------------|-----------|-----------|
|               |               |             | X                       | Y         | Z         |
| 1             | 6             | 0           | 0.942378                | 1.791235  | -0.015457 |
| 2             | 6             | 0           | 2.000735                | 0.901845  | -0.005891 |
| 3             | 6             | 0           | 1.721900                | -0.455970 | 0.005650  |
| 4             | 6             | 0           | 0.397148                | -0.866285 | 0.006836  |
| 5             | 6             | 0           | -0.547176               | 0.131475  | -0.002691 |
| 6             | 7             | 0           | -0.325142               | 1.417173  | -0.012899 |
| 7             | 1             | 0           | 1.127626                | 2.852247  | -0.025466 |
| 8             | 1             | 0           | 3.014884                | 1.263836  | -0.007697 |
| 9             | 1             | 0           | 0.128649                | -1.903925 | 0.013717  |
| 10            | 8             | 0           | 2.666262                | -1.405169 | 0.015772  |
| 11            | 8             | 0           | -2.807507               | 0.587474  | 0.044580  |
| 12            | 8             | 0           | -2.202464               | -1.458451 | -0.040514 |
| 13            | 7             | 0           | -1.982017               | -0.273233 | 0.000663  |
| 14            | 1             | 0           | 3.538729                | -1.024369 | 0.015718  |

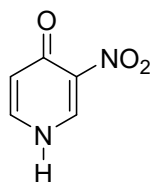

E = -527.8388884 a.u.

| Center Number | Atomic Number | Atomic Type | Coordinates (Angstroms) |           |           |
|---------------|---------------|-------------|-------------------------|-----------|-----------|
|               |               |             | X                       | Y         | Z         |
| 1             | 6             | 0           | 0.376219                | -1.349126 | -0.056013 |
| 2             | 6             | 0           | -0.275984               | -0.169929 | -0.005045 |
| 3             | 6             | 0           | 0.428674                | 1.116447  | 0.084460  |
| 4             | 6             | 0           | 1.881650                | 0.947513  | 0.019797  |
| 5             | 6             | 0           | 2.465352                | -0.252585 | -0.056779 |
| 6             | 7             | 0           | 1.719043                | -1.401607 | -0.085971 |
| 7             | 1             | 0           | -0.160754               | -2.278806 | -0.078528 |
| 8             | 1             | 0           | 2.475763                | 1.841960  | 0.049422  |
| 9             | 1             | 0           | 3.530640                | -0.386974 | -0.095456 |
| 10            | 1             | 0           | 2.173394                | -2.289464 | -0.139377 |
| 11            | 7             | 0           | -1.726234               | -0.245665 | -0.026330 |
| 12            | 8             | 0           | -2.326315               | 0.679002  | -0.490325 |
| 13            | 8             | 0           | -2.233642               | -1.259886 | 0.403881  |
| 14            | 8             | 0           | -0.093063               | 2.192168  | 0.227885  |

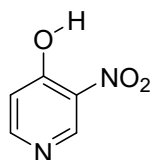

E = -527.857049 a.u.

| Center Number | Atomic Number | Atomic Type | Coordinates (Angstroms) |           |          |
|---------------|---------------|-------------|-------------------------|-----------|----------|
|               |               |             | X                       | Y         | Z        |
| 1             | 6             | 0           | 1.324659                | 0.757825  | 0.000000 |
| 2             | 6             | 0           | 0.000000                | 0.327172  | 0.000000 |
| 3             | 6             | 0           | -0.288215               | -1.043500 | 0.000000 |
| 4             | 6             | 0           | 0.809875                | -1.899593 | 0.000000 |
| 5             | 6             | 0           | 2.074489                | -1.368460 | 0.000000 |
| 6             | 7             | 0           | 2.346711                | -0.061033 | 0.000000 |
| 7             | 1             | 0           | 1.524755                | 1.814863  | 0.000000 |
| 8             | 1             | 0           | 0.642140                | -2.960841 | 0.000000 |
| 9             | 1             | 0           | 2.928657                | -2.025278 | 0.000000 |
| 10            | 7             | 0           | -1.047005               | 1.316838  | 0.000000 |
| 11            | 8             | 0           | -2.201026               | 0.916378  | 0.000000 |
| 12            | 8             | 0           | -0.749360               | 2.476295  | 0.000000 |
| 13            | 8             | 0           | -1.496034               | -1.568222 | 0.000000 |
| 14            | 1             | 0           | -2.146986               | -0.855657 | 0.000000 |

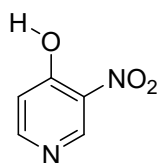

E = -527.8411732 a.u.

| Center Number | Atomic Number | Atomic Type | Coordinates (Angstroms) |           |           |
|---------------|---------------|-------------|-------------------------|-----------|-----------|
|               |               |             | X                       | Y         | Z         |
| 1             | 6             | 0           | 0.458674                | -1.430818 | -0.086111 |
| 2             | 6             | 0           | -0.229876               | -0.231486 | -0.010837 |
| 3             | 6             | 0           | 0.475519                | 0.966620  | 0.065157  |
| 4             | 6             | 0           | 1.861100                | 0.867131  | 0.046636  |
| 5             | 6             | 0           | 2.448288                | -0.375538 | -0.047604 |
| 6             | 7             | 0           | 1.772503                | -1.514961 | -0.114976 |
| 7             | 1             | 0           | -0.103857               | -2.346947 | -0.130577 |
| 8             | 1             | 0           | 2.468566                | 1.754072  | 0.110658  |
| 9             | 1             | 0           | 3.522776                | -0.456964 | -0.064941 |
| 10            | 7             | 0           | -1.683717               | -0.280981 | -0.020295 |
| 11            | 8             | 0           | -2.275465               | 0.640070  | -0.513051 |
| 12            | 8             | 0           | -2.196910               | -1.266718 | 0.448566  |
| 13            | 8             | 0           | -0.159464               | 2.127039  | 0.184630  |
| 14            | 1             | 0           | 0.463493                | 2.842858  | 0.267161  |

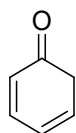

E = -307.339104 a.u.

| Center Number | Atomic Number | Atomic Type | Coordinates (Angstroms) |           |           |
|---------------|---------------|-------------|-------------------------|-----------|-----------|
|               |               |             | X                       | Y         | Z         |
| 1             | 6             | 0           | 1.115151                | -1.225980 | 0.000000  |
| 2             | 6             | 0           | 1.276967                | 0.256145  | 0.000000  |
| 3             | 6             | 0           | 0.000000                | 1.074619  | 0.000000  |
| 4             | 6             | 0           | -1.268239               | 0.342206  | 0.000000  |
| 5             | 6             | 0           | -1.292428               | -0.994604 | 0.000000  |
| 6             | 6             | 0           | -0.082365               | -1.801727 | 0.000000  |
| 7             | 1             | 0           | 2.011478                | -1.824176 | 0.000000  |
| 8             | 1             | 0           | 1.861362                | 0.570524  | 0.863781  |
| 9             | 1             | 0           | -2.167307               | 0.933376  | 0.000000  |
| 10            | 1             | 0           | -2.240010               | -1.508322 | 0.000000  |
| 11            | 1             | 0           | -0.179861               | -2.873372 | 0.000000  |
| 12            | 8             | 0           | 0.044808                | 2.278436  | 0.000000  |
| 13            | 1             | 0           | 1.861362                | 0.570524  | -0.863781 |

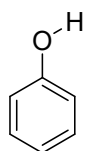

E = -307.3696098 a.u.

| Center<br>Number | Atomic<br>Number | Atomic<br>Type | Coordinates (Angstroms) |           |          |
|------------------|------------------|----------------|-------------------------|-----------|----------|
|                  |                  |                | X                       | Y         | Z        |
| 1                | 6                | 0              | -1.178669               | -1.153733 | 0.000000 |
| 2                | 6                | 0              | -1.195036               | 0.230980  | 0.000000 |
| 3                | 6                | 0              | 0.000000                | 0.932750  | 0.000000 |
| 4                | 6                | 0              | 1.206940                | 0.251908  | 0.000000 |
| 5                | 6                | 0              | 1.210397                | -1.129916 | 0.000000 |
| 6                | 6                | 0              | 0.021081                | -1.842226 | 0.000000 |
| 7                | 1                | 0              | -2.110829               | -1.692430 | 0.000000 |
| 8                | 1                | 0              | -2.132929               | 0.763296  | 0.000000 |
| 9                | 1                | 0              | 2.123059                | 0.815368  | 0.000000 |
| 10               | 1                | 0              | 2.150916                | -1.654028 | 0.000000 |
| 11               | 1                | 0              | 0.030516                | -2.917840 | 0.000000 |
| 12               | 8                | 0              | 0.047753                | 2.287170  | 0.000000 |
| 13               | 1                | 0              | -0.831036               | 2.649699  | 0.000000 |
